RESEARCH ARTICLE

# Current Developments in Dementia Risk Prediction Modelling: An Updated Systematic Review

Eugene Y. H. Tang<sup>1\*</sup>, Stephanie L. Harrison<sup>1</sup>, Linda Errington<sup>2</sup>, Mark F. Gordon<sup>3</sup>, Pieter Jelle Visser<sup>4,5</sup>, Gerald Novak<sup>6</sup>, Carole Dufouil<sup>7</sup>, Carol Brayne<sup>8</sup>, Louise Robinson<sup>1</sup>, Lenore J. Launer<sup>9</sup>, Blossom C. M. Stephan<sup>1</sup>

**1** Institute of Health and Society, Newcastle University Institute of Ageing, Newcastle University, Newcastle upon Tyne, NE2 4AX, United Kingdom, **2** Medical School, Newcastle University, Newcastle upon Tyne, NE2 4HH, United Kingdom, **3** Boehringer Ingelheim Pharmaceuticals, Inc., 900 Ridgebury Road, Ridgefield, Connecticut, 06877, United States of America, **4** Maastricht University, Department of Psychiatry & Neuropsychology, School for Mental Health and Neuroscience, Maastricht, The Netherlands, **5** VU University Medical Centre, Department of Neurology, Alzheimer Centre, Neuroscience Campus, Amsterdam, The Netherlands, **6** Janssen Pharmaceutical Research and Development, 1125 Trenton-Harbourton Road, Titusville, New Jersey, 08560, United States of America, **7** Inserm Research Centre (U897), Team Neuroepidemiology, F-33000, Bordeaux, France, **8** Department of Public Health and Primary Care, Cambridge University, Cambridge, CB2 0SR, United Kingdom, **9** Laboratory of Epidemiology, Demography and Biometry, National Institute on Aging, National Institutes of Health (NIH), Bethesda, Maryland, United States of America

\* [e.y.h.tang@newcastle.ac.uk](mailto:e.y.h.tang@newcastle.ac.uk)

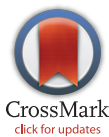

**OPEN ACCESS**

**Citation:** Tang EYH, Harrison SL, Errington L, Gordon MF, Visser PJ, Novak G, et al. (2015) Current Developments in Dementia Risk Prediction Modelling: An Updated Systematic Review. PLoS ONE 10(9): e0136181. doi:10.1371/journal.pone.0136181

**Editor:** Gianluigi Fortoni, "Mario Negri" Institute for Pharmacological Research, ITALY

**Received:** April 3, 2015

**Accepted:** July 30, 2015

**Published:** September 3, 2015

**Copyright:** This is an open access article, free of all copyright, and may be freely reproduced, distributed, transmitted, modified, built upon, or otherwise used by anyone for any lawful purpose. The work is made available under the [Creative Commons CC0](https://creativecommons.org/licenses/by/4.0/) public domain dedication.

**Data Availability Statement:** All relevant data are within the paper and its Supporting Information file.

**Funding:** Tang EYH is supported by an NIHR Academic Clinical Fellowship. The research leading to these results has received support from the Innovative Medicines Initiative Joint Undertaking under EMIF grant agreement no. 115372, resources of which are composed of financial contributions from the European Union's Seventh Framework Programme (FP7/2007-2013) and EFPIA companies in kind contribution. This research (LJL) was also supported in part by the Intramural research Program of the NIH, National Institute on Aging. The funders

## Abstract

### Background

Accurate identification of individuals at high risk of dementia influences clinical care, inclusion criteria for clinical trials and development of preventative strategies. Numerous models have been developed for predicting dementia. To evaluate these models we undertook a systematic review in 2010 and updated this in 2014 due to the increase in research published in this area. Here we include a critique of the variables selected for inclusion and an assessment of model prognostic performance.

### Methods

Our previous systematic review was updated with a search from January 2009 to March 2014 in electronic databases (MEDLINE, Embase, Scopus, Web of Science). Articles examining risk of dementia in non-demented individuals and including measures of sensitivity, specificity or the area under the curve (AUC) or c-statistic were included.

### Findings

In total, 1,234 articles were identified from the search; 21 articles met inclusion criteria. New developments in dementia risk prediction include the testing of non-APOE genes, use of non-traditional dementia risk factors, incorporation of diet, physical function and ethnicity, and model development in specific subgroups of the population including individuals with

had no role in the writing of the manuscript or decision to submit it for publication.

**Competing Interests:** Dr. G. Novak is an employee of Janssen Research and Development, LLC. Dr. M Gordon is an employee of Boehringer Ingelheim Pharmaceuticals. Boehringer Ingelheim Pharmaceuticals and Janssen Research and Development provided support in the form of salaries for authors [G.N., M.G.], but did not have any additional role in the study design, data collection and analysis, decision to publish, or preparation of the manuscript. The specific roles of these authors are articulated in the 'author contributions' section.

diabetes and those with different educational levels. Four models have been externally validated. Three studies considered time or cost implications of computing the model.

## Interpretation

There is no one model that is recommended for dementia risk prediction in population-based settings. Further, it is unlikely that one model will fit all. Consideration of the optimal features of new models should focus on methodology (setting/sample, model development and testing in a replication cohort) and the acceptability and cost of attaining the risk variables included in the prediction score. Further work is required to validate existing models or develop new ones in different populations as well as determine the ethical implications of dementia risk prediction, before applying the particular models in population or clinical settings.

## Introduction

Dementia is a complex disease often caused by a combination of genetic and environmental risk factors. Although many risk factors for the occurrence and progression of dementia have been identified, their utility for determining individual risk through dementia prediction models remains unclear.

Numerous models for predicting dementia, and more specifically Alzheimer's Disease (AD), have been developed[1]. Such models could be used to refine inclusion criteria for clinical trials, focus treatment and intervention more effectively and help with health surveillance. A systematic review published in 2010 identified over 50 different dementia risk prediction models[1]. The models differed in the number and type of variables used for risk score calculation, follow-up time, disease outcome and model predictive accuracy. The review concluded that no model could be recommended for dementia risk prediction largely due to methodological weaknesses of the published studies. Model development had generally been based on small cohorts, restricted to Caucasians, and at the time of the review there had been a lack of objective and unbiased model evaluation, such as external validation.

Over the last five years, research into dementia risk prediction has greatly expanded and dementia prevention is a high policy priority in many countries. In order for clinicians, researchers and policy makers to keep up to date on relevant findings and make decisions about which model to apply to identify those high risk of future dementia, it is necessary to have an accurate knowledge of model development (including component variables and validation work), discriminative accuracy, and sensitivity and specificity of cut-off scores. In this review, based on the results of an updated literature search, we aim to evaluate the latest developments in dementia risk prediction modelling including a critique of the variables selected for model inclusion and an assessment of model prognostic performance.

## Methods

### Search Strategy

This review has been undertaken with adherence to the PRISMA statement[2]. MEDLINE, Embase, Scopus and ISI Web of Science were searched using combinations of the following terms and mapped to Medical Subject Headings (MeSH): "dementia", "Alzheimer disease", "Alzheimer and disease", "predict", "develop", "incident", "sensitivity", "specificity", "ROC"

**Table 1. Search Strategy.**

|                                      |
|--------------------------------------|
| 1. exp dementia                      |
| 2. predict\$.mp.                     |
| 3. develop\$.mp.                     |
| 4. inciden\$.mp.                     |
| 5. sensitivity.mp.                   |
| 6. specificity.mp.                   |
| 7. "sensitivity and specificity"     |
| 8. 2 or 3 or 4 or 5 or 6 or 7        |
| 9. receiver operating characteristic |
| 10. ROC.mp.                          |
| 11. area under the curve             |
| 12. AUC.mp.                          |
| 13. concordance statistic.mp.        |
| 14. c statistic.mp.                  |
| 15. 9 or 10 or 11 or 12 or 13 or 14  |
| 16. 1 and 8 and 15                   |
| 17. limit 16 to yr = "2009-Current"  |

doi:10.1371/journal.pone.0136181.t001

and “area under the curve”. The search included all literature published between the 1 January 2009 to 17 March 2014 (see [Table 1](#) for the search strategy). Only articles published in English were considered. Additional articles were identified from the reference lists of eligible studies and relevant reviews. All articles published from January 2009 –November 2009 were also removed as this was covered in the original review.

### Selection of Studies

Selection of articles followed the same protocol as the 2010 review[1]. Two authors (ET and SH) independently searched publications using the following inclusion criteria: the sample was population-based and the article examined risk of dementia in non-demented individuals and included measurements of sensitivity, specificity or discrimination (i.e., area under the curve: AUC or c-statistic). Cross-sectional, case-control and clinical-based studies were excluded, as were studies that restricted the baseline sample by cognitive criteria other than dementia status; for example studies were excluded that focused only on subjects with Mild Cognitive Impairment (MCI). Articles where the outcome was a combined cognitive group, for example dementia cases combined with individuals with MCI, were also excluded. Titles and abstracts were searched first, followed by the full text of any identified articles. Where duplicate studies were identified, details of all novel risk models and their performance indices (AUC/c-statistic, sensitivity or specificity) were extracted from each publication and reported separately. One set of duplicate publications was found[3, 4]. However, the first paper[3] only presented the model and did not undertake testing. This paper was therefore excluded. Disagreements were solved by consensus between the two authors (ET and SH), or by a third author (BCMS) if the disagreement could not be resolved.

### Data Extraction

Two authors (ET and SH) independently extracted information from each study including: sample, country, length of follow-up, baseline age, sex distribution, outcome tested (e.g., all-cause dementia vs. dementia subtypes), the components of each prediction model,

discriminative accuracy (AUC or c-statistic), and where available, sensitivity and specificity estimates of cut-off scores and positive/negative likelihood ratio (LR+ or LR-, respectively). Two authors (ET, SH) independently assessed the quality of the included studies using an adapted version of the Newcastle-Ottawa Scale (NOS) for non-randomized studies, specifically cohort studies[5], as endorsed by the Cochrane collaboration [6]. The NOS uses a star rating system to assess selection, comparability and outcome criteria. Items describing a non-intervention cohort were excluded and therefore the total ranking was out of 6 (rather than 9).

## Results

### Included Studies

A total of 1,234 articles were identified from the electronic literature search (after removing duplicate publications) and 11 articles were identified from other sources. In total, 21 articles describing dementia risk prediction models were included in this review (Fig 1).

Table 2 summarises the study characteristics and predictive models. 13 new study populations[7–20] have been used to create risk models compared to the first review (all literature till 2009)[1]. There was however some overlap including use of data from the Cardiovascular Health Cognition Study[20, 21], Leipzig Longitudinal Study of the Aged (LEILA 75+)[22], Einstein Aging Study[23], Vienna TransDanube Aging[24], Canadian Study of Health and Aging [25] and the Kungsholmen Project[4]. Sample sizes ranged from 194[11] to 29,961[13]. Follow-up duration ranged from 1.4[22] to 20 years[7]. Follow-up rate ranged from 66%[12] to 86% [19], with 10 studies[4, 7, 11, 14, 15, 17, 20, 21, 23, 25] not reporting attrition or dropout. In ten studies[7, 10, 12–14, 16, 20–22, 26] the outcome tested was all-cause dementia, in nine studies [8, 9, 11, 15, 17–19, 23, 24] the outcome was AD and two studies had separate models for both AD and all-cause dementia [4, 25]. The number of predictors ranged from one[22] to 19[25].

### Quality Assessment

Articles were assessed on selection, comparability and outcome (out of a maximum of six stars). In total, six[8, 13, 16, 18, 19, 26] articles scored six stars (maximum), 13 scored five stars [4, 7, 9–12, 14, 15, 17, 20, 22–24] and two[21, 25] scored four stars. This indicates that most articles were of high or moderate quality. Star ratings for each article are shown in Table 2.

### Model Development

Most models have been derived using Logistic Regression[7, 9, 10, 21, 24–26] or Cox Proportional Hazards Regression analysis[8, 11, 13, 15–20, 22, 23], usually using stepwise selection to identify candidate predictors (e.g., based on a p-value; forwards or backwards), with one model using the Bayesian Information Criterion[19]. One model, the Australian National University Alzheimer's Disease Risk Score (ANU-ADRI), was developed using an Evidence-Based Medicine Approach rather than through a data analytical approach[4] and another, the Brief Dementia Screening Indicator (BDSI) was developed using data synthesis based on the best dementia predictors identified in four different cohort studies[20]. When computed, simple risk scores have been derived from the model's Beta-[4, 13, 16, 19, 20] or logit-coefficients[21]. This is similar to the methodology employed for risk model development in other fields of medicine such as cardiovascular disease[27, 28]. No models have yet been developed using systems biology or neural network approaches. Neural networks simulate the functions of neurons of human brains which can interact for processing data and learning from experiences [29]. Given the potential complexity of the risk factor variables used in dementia risk prediction, neural networks may also hold promise although this has yet to be evaluated.

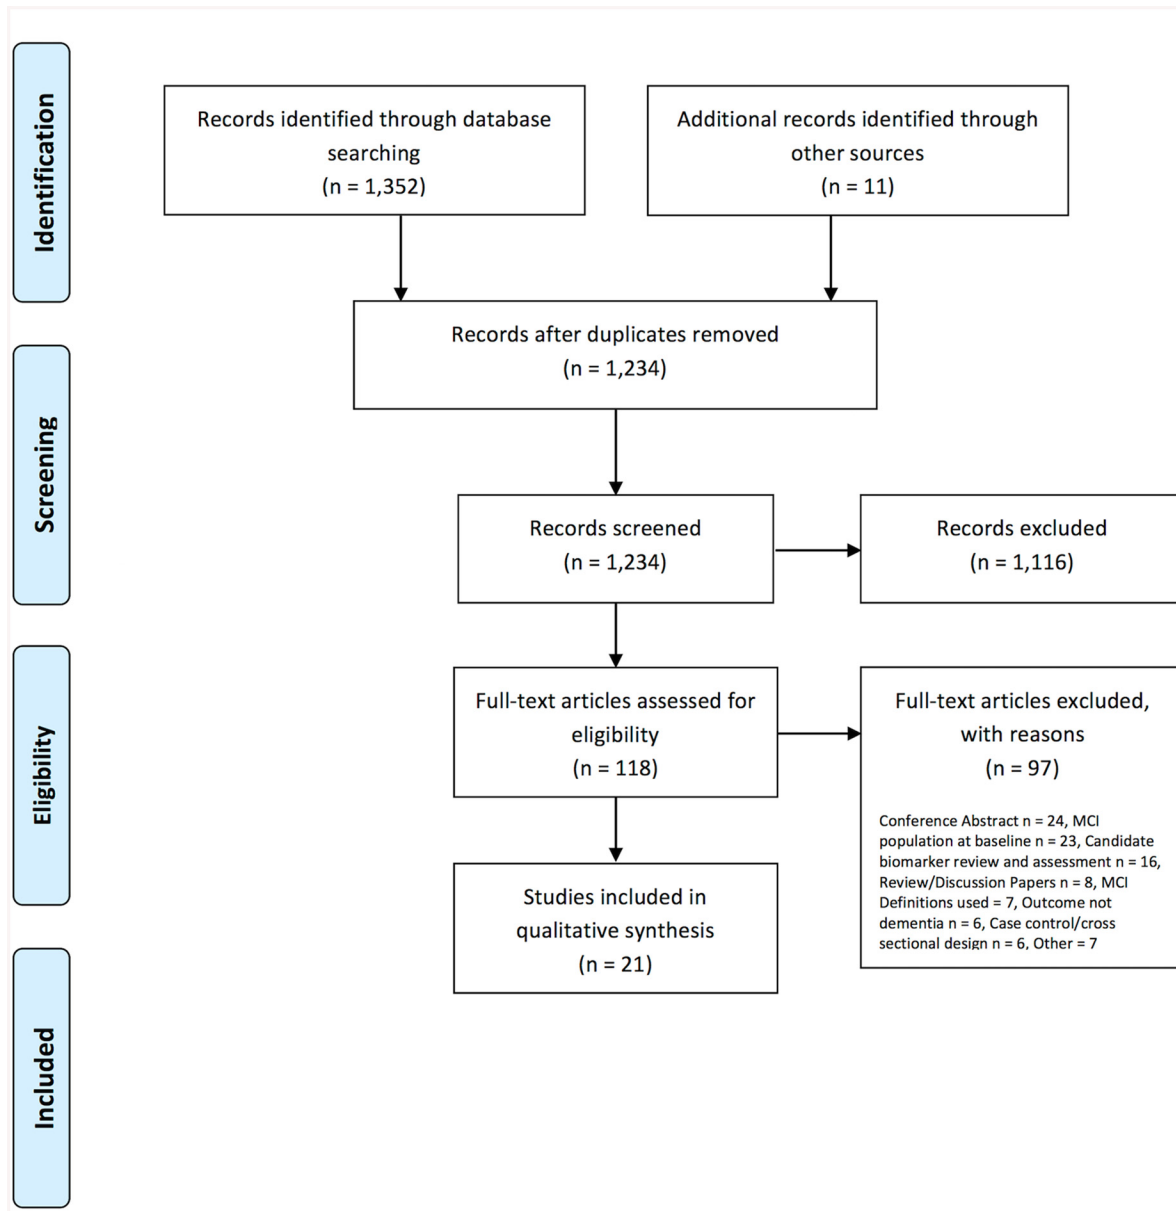

Fig 1. PRISMA (2009) flow diagram of article selection.

doi:10.1371/journal.pone.0136181.g001

## Risk Models

Models can be broadly divided into the following categories: (1) demographic only models; (2) cognitive based models (incorporating cognitive test scores, with or without subjective memory/cognitive complaint indicators or demographic data); (3) health variables and health risk indices (incorporating self-reported or objectively measured health status); (4) genetic risk scores including APOE, PICALM (Phosphatidylinositol binding clathrin assembly protein), CLU (Clusterin) and other genes associated with AD (i.e., BIN1, CR1, ABCA7, MS4A6A, MS4A4E, CD2AP, EPHA1 and CD33), either alone or in combination with non-genetic variables; and, (5) multi-variable models typically incorporating demographic, health and lifestyle measures. [Table 3](#) shows comparisons of the model components between this and the 2010

Table 2. Characteristics of included studies and reported dementia risk prediction models.

| Sample                                      | Follow-up sample | Number of events (type) | Diagnostic criteria | Dementia subtypes                                                           | Follow-up (years) and follow-up rate  | Baseline age (years) | Model                                                                                                      | Sn (%) | Sp (%) | AUC  | Validation                                               | Cal | Ex val | Follow-up rate                                           | Dementia subtypes tested | Additional notes                                                                                                                                                                                                                                                                                                                                                                                                           | Quality Assessment: Newcastle Ottawa Scale |
|---------------------------------------------|------------------|-------------------------|---------------------|-----------------------------------------------------------------------------|---------------------------------------|----------------------|------------------------------------------------------------------------------------------------------------|--------|--------|------|----------------------------------------------------------|-----|--------|----------------------------------------------------------|--------------------------|----------------------------------------------------------------------------------------------------------------------------------------------------------------------------------------------------------------------------------------------------------------------------------------------------------------------------------------------------------------------------------------------------------------------------|--------------------------------------------|
| <b>(1) Demographic and Cognitive Models</b> |                  |                         |                     |                                                                             |                                       |                      |                                                                                                            |        |        |      |                                                          |     |        |                                                          |                          |                                                                                                                                                                                                                                                                                                                                                                                                                            |                                            |
| Paquid (French Cohort Study) (7)            | 2882             | 804                     | DSM-III-R           | No                                                                          | 20 years (3 and 10 year models shown) | >65                  | LEL + (age, ≥75 years, 4-IADLs, episodic memory subtest) at 3 years                                        | 85.0   | 39.0   | 0.75 | Yes, bootstrap case cross validation with bias reduction | No  | No     | No                                                       | No                       | Sn and Sp for a cut point corresponding to Sn = 0.85 in the learning sample.                                                                                                                                                                                                                                                                                                                                               | *****                                      |
|                                             |                  |                         |                     |                                                                             |                                       |                      | LEL + (age, ≥75 years, 4-IADLs score, DSST) at 10 years                                                    | 82.0   | 50.0   | 0.75 | Yes (as above)                                           | No  | No     | No                                                       | No                       |                                                                                                                                                                                                                                                                                                                                                                                                                            |                                            |
|                                             |                  |                         |                     |                                                                             |                                       |                      | HEL + (age, ≥75 years, memory complaints (new information), IST, DSST, episodic memory subtest) at 3 years | 83.0   | 69.0   | 0.85 | Yes (as above)                                           | No  | No     | No                                                       | No                       |                                                                                                                                                                                                                                                                                                                                                                                                                            |                                            |
|                                             |                  |                         |                     |                                                                             |                                       |                      | HEL + (age, ≥75 years, IST, BVRT, DSST, episodic memory subtest) at 10 years                               | 84.0   | 52.0   | 0.78 | Yes (as above)                                           | No  | No     | No                                                       | No                       |                                                                                                                                                                                                                                                                                                                                                                                                                            |                                            |
| The Canadian Study of Health and Ageing(26) | 284              | 75                      | DSM-III-R           | Probable AD 31, possible AD 20, vascular dementia 18, FTD 2, dementia NOS 3 | 10 years                              | ≥65                  | Age, education, gender, RAVLT, short delay recall, WAIS-R digit symbol: Cut off 0.19                       | 84.0   | 64.0   |      | Yes, bootstrapping 1000 samples                          | No  | No     | 19% lost at follow-up, 6% refused, 55% died at follow-up | No                       | 0.23 cut-off optimal for 10 years; 0.22 optimal for 5 years. Using the bootstrap method, for the 10-year study, the potential overestimation was 0.0211 giving validated ROC performance estimates of 0.785–0.0211 = 0.764. For the 5-year study, the potential overestimation was 0.0136 producing a performance estimate of 0.807. The small sizes of the overestimations confirm the stability of the predictive models | *****                                      |

(Continued)

Table 2. (Continued)

| Sample | Follow-up sample | Number of events (type) | Diagnostic criteria                                                                       | Dementia subtypes | Follow-up (years) and follow-up rate | Baseline age (years)                                                                                                  | Model | Sn (%) | Sp (%)                          | AUC                             | Validation | Cal | Ex val | Follow-up rate | Dementia subtypes tested | Additional notes | Quality Assessment: Newcastle Ottawa Scale |
|--------|------------------|-------------------------|-------------------------------------------------------------------------------------------|-------------------|--------------------------------------|-----------------------------------------------------------------------------------------------------------------------|-------|--------|---------------------------------|---------------------------------|------------|-----|--------|----------------|--------------------------|------------------|--------------------------------------------|
| 634    | 148              | DSM-III-R               | Probable AD 60, possible AD 36, VaD 40, PD 4, FTD 1, dementia due to HI 1, dementia NOS 6 | 5 years           | ≥65                                  | Age, education, gender, RAVLT, short delay recall, WAIS-R digit symbol: Cut off 0.21                                  | 80.0  | 68.0   | Yes, bootstrapping 1000 samples | No                              | No         |     |        |                |                          |                  |                                            |
|        |                  |                         |                                                                                           |                   |                                      | Age, education, gender, RAVLT, short delay recall, WAIS-R digit symbol: Cut off 0.23                                  | 78.0  | 72.0   | 0.79                            | Yes, bootstrapping 1000 samples | No         | No  |        |                |                          |                  |                                            |
|        |                  |                         |                                                                                           |                   |                                      | Age, education, gender, RAVLT, short delay recall, WAIS-R digit symbol: Cut off 0.25                                  | 71.0  | 74.0   |                                 | Yes, bootstrapping 1000 samples | No         | No  |        |                |                          |                  |                                            |
|        |                  |                         |                                                                                           |                   |                                      | Age, education, gender, RAVLT, short delay recall, WAIS-R digit symbol: Cut off 0.27                                  | 64.0  | 77.0   |                                 | Yes, bootstrapping 1000 samples | No         | No  |        |                |                          |                  |                                            |
| 634    | 148              | DSM-III-R               | Probable AD 60, possible AD 36, VaD 40, PD 4, FTD 1, dementia due to HI 1, dementia NOS 6 | 5 years           | ≥65                                  | Age, education, gender, WMS information, RAVLT, short delay recall, Animal fluency, WAIS-R digit symbol: Cut off 0.17 | 79.0  | 70.0   | Yes, bootstrapping 1000 samples | No                              | No         |     |        |                |                          |                  |                                            |
|        |                  |                         |                                                                                           |                   |                                      | Age, education, gender, WMS information, RAVLT, short delay recall, Animal fluency, WAIS-R digit symbol: Cut off 0.19 | 76.0  | 71.0   |                                 | Yes, bootstrapping 1000 samples | No         | No  |        |                |                          |                  |                                            |
| 634    | 148              | DSM-III-R               | Probable AD 60, possible AD 36, VaD 40, PD 4, FTD 1, dementia due to HI 1, dementia NOS 6 | 5 years           | ≥65                                  | Age, education, gender, WMS information, RAVLT, short delay recall, Animal fluency, WAIS-R digit symbol: Cut off 0.22 | 75.0  | 74.0   | 0.82                            | Yes, bootstrapping 1000 samples | No         | No  |        |                |                          |                  |                                            |
|        |                  |                         |                                                                                           |                   |                                      | Age, education, gender, WMS information, RAVLT, short delay recall, Animal fluency, WAIS-R digit symbol: Cut off 0.23 | 70.0  | 78.0   |                                 | Yes, bootstrapping 1000 samples | No         | No  |        |                |                          |                  |                                            |

(Continued)

Table 2. (Continued)

| Sample                                                                                | Follow-up sample | Number of events (type) | Diagnostic criteria                                                          | Dementia subtypes    | Follow-up (years) and follow-up rate | Baseline age (years) | Model                                                                                                                 | Sn (%) | Sp (%) | AUC  | Validation                   | Cal | Ex val | Follow-up rate        | Dementia subtypes tested | Additional notes | Quality Assessment: Newcastle Ottawa Scale                                                                    |       |
|---------------------------------------------------------------------------------------|------------------|-------------------------|------------------------------------------------------------------------------|----------------------|--------------------------------------|----------------------|-----------------------------------------------------------------------------------------------------------------------|--------|--------|------|------------------------------|-----|--------|-----------------------|--------------------------|------------------|---------------------------------------------------------------------------------------------------------------|-------|
| Community dwelling, Massach-usetts (8)                                                | 342              | Not stated              | Consensus Diagnosis (dementia) and classified by NINCDS-ARDA and NINDS-AIREN | AD                   | Mean 7.4 years                       | ≥65                  | Age, education, gender, WMS information, RAVLT, short delay recall, Animal fluency, WAIS-R digit symbol. Cut off 0.25 | 65.0   | 80.0   | 0.78 | No                           | No  | No     | Follow-up >80%        | No                       | None             | *****                                                                                                         |       |
| <b>(2) Cognitive Models (Einstein Aging Study Also Contains Multivariable Models)</b> |                  |                         |                                                                              |                      |                                      |                      |                                                                                                                       |        |        |      |                              |     |        |                       |                          |                  |                                                                                                               |       |
| German Study on Aging Cognition and Dementia in Primary Care patients (AgeCoDe)(9)    | 1504             | 70                      | DSM-IV (clinical diagnosis)                                                  | 50 AD, 14 VaD, 6 NOS | 18 months                            | ≥75                  | CERAD Word-List Learning                                                                                              | 87.8   | 72.4   | 0.84 | No                           | No  | No     | Follow-up rate of 60% | No                       | None             | *****                                                                                                         |       |
| (Continued)                                                                           |                  |                         |                                                                              |                      |                                      |                      |                                                                                                                       |        |        |      |                              |     |        |                       |                          |                  |                                                                                                               |       |
|                                                                                       |                  |                         |                                                                              |                      |                                      |                      | CDR-sum-of-boxes (CDR-SB) adjusted for age, gender and education Clinician based                                      |        |        | 0.76 |                              |     |        |                       |                          |                  |                                                                                                               |       |
|                                                                                       |                  |                         |                                                                              |                      |                                      |                      | CDR-sum-of-boxes (CDR-SB) adjusted for age, gender and education Algorithm based                                      |        |        |      |                              |     |        |                       |                          |                  |                                                                                                               |       |
|                                                                                       |                  |                         |                                                                              |                      |                                      |                      | CERAD Word-List Recall                                                                                                | 85.7   | 62.3   | 0.84 | No                           | No  | No     |                       | No                       |                  |                                                                                                               |       |
|                                                                                       |                  |                         |                                                                              |                      |                                      |                      | CERAD Total Score                                                                                                     | 85.7   | 83.1   | 0.89 | No                           | No  | No     |                       | No                       |                  |                                                                                                               |       |
|                                                                                       |                  |                         |                                                                              |                      |                                      |                      | CERAD Total Score 2 (including Constructional Praxis Recall)                                                          | 89.8   | 78.8   | 0.89 | No                           | No  | No     |                       | No                       |                  |                                                                                                               |       |
|                                                                                       |                  |                         |                                                                              |                      |                                      |                      | CERAD Forward-Selection Mode                                                                                          | 88.0   | 81.6   | 0.88 | No                           | No  | No     |                       | No                       |                  |                                                                                                               |       |
|                                                                                       |                  |                         |                                                                              |                      |                                      |                      | MMSE                                                                                                                  | 87.8   | 72.1   | 0.82 | No                           | No  | No     |                       | No                       |                  |                                                                                                               |       |
| Einstein Aging Study (EAS) (all individuals had memory complaints) (23)               | 854              | 86 (AD)                 | DSM-IV (clinical diagnosis)                                                  | AD                   | 2-4 years (mean 4.2)                 | ≥70 (mean 78.8)      | FCSRT-FR 2 years                                                                                                      |        |        | 0.87 | Yes, all models bootstrapped | No  | No     | No                    | No                       | statement        | Cut scores are Youden's index cut. (FCSRT-FR 28); Cut scores are Youden's index cut. (FCSRT-FR 28) (LM-IR 16) | ***** |
| (Continued)                                                                           |                  |                         |                                                                              |                      |                                      |                      |                                                                                                                       |        |        |      |                              |     |        |                       |                          |                  |                                                                                                               |       |
|                                                                                       |                  |                         |                                                                              |                      |                                      |                      | Cut off score 32                                                                                                      | 94.1   | 47.0   |      | No                           | No  | No     |                       | No                       |                  |                                                                                                               |       |
|                                                                                       |                  |                         |                                                                              |                      |                                      |                      | Cut off score 31                                                                                                      | 91.3   | 55.7   |      | No                           | No  | No     |                       | No                       |                  |                                                                                                               |       |
|                                                                                       |                  |                         |                                                                              |                      |                                      |                      | Cut off score 30                                                                                                      | 89.7   | 60.8   |      | No                           | No  | No     |                       | No                       |                  |                                                                                                               |       |
|                                                                                       |                  |                         |                                                                              |                      |                                      |                      | Cut off score 29                                                                                                      | 88.3   | 68.6   |      | No                           | No  | No     |                       | No                       |                  |                                                                                                               |       |
|                                                                                       |                  |                         |                                                                              |                      |                                      |                      | Cut off score 28                                                                                                      | 85.7   | 73.6   |      | No                           | No  | No     |                       | No                       |                  |                                                                                                               |       |
|                                                                                       |                  |                         |                                                                              |                      |                                      |                      | Cut off score 27                                                                                                      | 80.8   | 78.4   |      | No                           | No  | No     |                       | No                       |                  |                                                                                                               |       |

(Continued)



Table 2. (Continued)

| Sample | Follow-up sample | Number of events (type) | Diagnostic criteria | Dementia subtypes | Follow-up (years) and follow-up rate | Baseline age (years) | Model            | Sn (%) | Sp (%) | AUC  | Validation | Cal | Ex val | Follow-up rate | Dementia subtypes tested | Additional notes | Quality Assessment: Newcastle Ottawa Scale |
|--------|------------------|-------------------------|---------------------|-------------------|--------------------------------------|----------------------|------------------|--------|--------|------|------------|-----|--------|----------------|--------------------------|------------------|--------------------------------------------|
|        |                  |                         |                     |                   |                                      |                      | Cut off score 26 | 73.1   | 82.6   |      | No         | No  | No     |                |                          |                  |                                            |
|        |                  |                         |                     |                   |                                      |                      | Cut off score 25 | 67.6   | 85.5   |      | No         | No  | No     |                |                          |                  |                                            |
|        |                  |                         |                     |                   |                                      |                      | Cut off score 24 | 63.3   | 88.5   |      | No         | No  | No     |                |                          |                  |                                            |
|        |                  |                         |                     |                   |                                      |                      | Cut off score 23 | 59.1   | 91.3   |      | No         | No  | No     |                |                          |                  |                                            |
|        |                  |                         |                     |                   |                                      |                      | Cut off score 22 | 53.7   | 94.2   |      | No         | No  | No     |                |                          |                  |                                            |
|        |                  |                         |                     |                   |                                      |                      | FCSRT-FR 3 years |        |        | 0.88 | No         | No  | No     |                |                          |                  |                                            |
|        |                  |                         |                     |                   |                                      |                      | Cut score 32     | 96.2   | 48.2   |      | No         | No  | No     |                |                          |                  |                                            |
|        |                  |                         |                     |                   |                                      |                      | Cut score 31     | 94.3   | 57.1   |      | No         | No  | No     |                |                          |                  |                                            |
|        |                  |                         |                     |                   |                                      |                      | Cut score 30     | 92.0   | 52.2   |      | No         | No  | No     |                |                          |                  |                                            |
|        |                  |                         |                     |                   |                                      |                      | Cut score 29     | 87.6   | 70.0   |      | No         | No  | No     |                |                          |                  |                                            |
|        |                  |                         |                     |                   |                                      |                      | Cut score 28     | 82.1   | 75.1   |      | No         | No  | No     |                |                          |                  |                                            |
|        |                  |                         |                     |                   |                                      |                      | Cut score 27     | 76.4   | 79.6   |      | No         | No  | No     |                |                          |                  |                                            |
|        |                  |                         |                     |                   |                                      |                      | Cut score 26     | 67.9   | 83.6   |      | No         | No  | No     |                |                          |                  |                                            |
|        |                  |                         |                     |                   |                                      |                      | Cut score 25     | 62.8   | 86.5   |      | No         | No  | No     |                |                          |                  |                                            |
|        |                  |                         |                     |                   |                                      |                      | Cut score 24     | 56.2   | 89.4   |      | No         | No  | No     |                |                          |                  |                                            |
|        |                  |                         |                     |                   |                                      |                      | Cut score 23     | 54.6   | 92.3   |      | No         | No  | No     |                |                          |                  |                                            |
|        |                  |                         |                     |                   |                                      |                      | Cut score 22     | 49.7   | 95.1   |      | No         | No  | No     |                |                          |                  |                                            |
|        |                  |                         |                     |                   |                                      |                      | FCSRT-FR 4 years |        |        | 0.89 | No         | No  | No     |                |                          |                  |                                            |
|        |                  |                         |                     |                   |                                      |                      | Cut score 32     | 97.2   | 49.6   |      | No         | No  | No     |                |                          |                  |                                            |
|        |                  |                         |                     |                   |                                      |                      | Cut score 31     | 95.9   | 58.8   |      | No         | No  | No     |                |                          |                  |                                            |
|        |                  |                         |                     |                   |                                      |                      | Cut score 30     | 93.8   | 64.0   |      | No         | No  | No     |                |                          |                  |                                            |
|        |                  |                         |                     |                   |                                      |                      | Cut score 29     | 89.6   | 71.8   |      | No         | No  | No     |                |                          |                  |                                            |
|        |                  |                         |                     |                   |                                      |                      | Cut score 28     | 84.9   | 77.0   |      | No         | No  | No     |                |                          |                  |                                            |
|        |                  |                         |                     |                   |                                      |                      | Cut score 27     | 80.9   | 81.7   |      | No         | No  | No     |                |                          |                  |                                            |
|        |                  |                         |                     |                   |                                      |                      | Cut score 26     | 73.2   | 85.7   |      | No         | No  | No     |                |                          |                  |                                            |
|        |                  |                         |                     |                   |                                      |                      | Cut score 25     | 66.7   | 88.3   |      | No         | No  | No     |                |                          |                  |                                            |
|        |                  |                         |                     |                   |                                      |                      | Cut score 24     | 59.5   | 90.9   |      | No         | No  | No     |                |                          |                  |                                            |
|        |                  |                         |                     |                   |                                      |                      | Cut score 23     | 52.5   | 93.4   |      | No         | No  | No     |                |                          |                  |                                            |
|        |                  |                         |                     |                   |                                      |                      | Cut score 22     | 44.1   | 95.8   |      | No         | No  | No     |                |                          |                  |                                            |
|        |                  |                         |                     |                   |                                      |                      | LMIR 2 years     |        |        | 0.78 | No         | No  | No     |                |                          |                  |                                            |
|        |                  |                         |                     |                   |                                      |                      | Cut score 22     | 94.4   | 39.9   |      | No         | No  | No     |                |                          |                  |                                            |
|        |                  |                         |                     |                   |                                      |                      | Cut score 21     | 92.4   | 46.0   |      | No         | No  | No     |                |                          |                  |                                            |
|        |                  |                         |                     |                   |                                      |                      | Cut score 20     | 89.9   | 50.7   |      | No         | No  | No     |                |                          |                  |                                            |
|        |                  |                         |                     |                   |                                      |                      | Cut score 19     | 83.5   | 57.0   |      | No         | No  | No     |                |                          |                  |                                            |
|        |                  |                         |                     |                   |                                      |                      | Cut score 18     | 79.2   | 61.5   |      | No         | No  | No     |                |                          |                  |                                            |
|        |                  |                         |                     |                   |                                      |                      | Cut score 17     | 74.6   | 66.9   |      | No         | No  | No     |                |                          |                  |                                            |
|        |                  |                         |                     |                   |                                      |                      | Cut score 16     | 71.9   | 71.1   |      | No         | No  | No     |                |                          |                  |                                            |
|        |                  |                         |                     |                   |                                      |                      | Cut score 15     | 66.7   | 75.1   |      | No         | No  | No     |                |                          |                  |                                            |
|        |                  |                         |                     |                   |                                      |                      | Cut score 14     | 57.5   | 80.7   |      | No         | No  | No     |                |                          |                  |                                            |
|        |                  |                         |                     |                   |                                      |                      | Cut score 13     | 49.5   | 84.0   |      | No         | No  | No     |                |                          |                  |                                            |
|        |                  |                         |                     |                   |                                      |                      | Cut score 12     | 43.2   | 86.9   |      | No         | No  | No     |                |                          |                  |                                            |
|        |                  |                         |                     |                   |                                      |                      | Cut score 11     | 35.1   | 89.5   |      | No         | No  | No     |                |                          |                  |                                            |
|        |                  |                         |                     |                   |                                      |                      | LMIR 3 years     |        |        | 0.77 | No         | No  | No     |                |                          |                  |                                            |

(Continued)

Table 2. (Continued)

| Sample | Follow-up sample | Number of events (type) | Diagnostic criteria | Dementia subtypes | Follow-up (years) and follow-up rate | Baseline age (years) | Model                                                                      | Sn (%) | Sp (%) | AUC  | Validation | Cal | Ex val | Follow-up rate | Dementia subtypes tested | Additional notes | Quality Assessment: Newcastle Ottawa Scale |
|--------|------------------|-------------------------|---------------------|-------------------|--------------------------------------|----------------------|----------------------------------------------------------------------------|--------|--------|------|------------|-----|--------|----------------|--------------------------|------------------|--------------------------------------------|
|        |                  |                         |                     |                   |                                      |                      | Cut score 22                                                               | 92.9   | 40.7   |      |            | No  | No     |                |                          |                  |                                            |
|        |                  |                         |                     |                   |                                      |                      | Cut score 21                                                               | 90.8   | 46.9   |      |            | No  | No     |                |                          |                  |                                            |
|        |                  |                         |                     |                   |                                      |                      | Cut score 20                                                               | 88.6   | 51.7   |      |            | No  | No     |                |                          |                  |                                            |
|        |                  |                         |                     |                   |                                      |                      | Cut score 19                                                               | 84.4   | 58.1   |      |            | No  | No     |                |                          |                  |                                            |
|        |                  |                         |                     |                   |                                      |                      | Cut score 18                                                               | 80.8   | 62.6   |      |            | No  | No     |                |                          |                  |                                            |
|        |                  |                         |                     |                   |                                      |                      | Cut score 17                                                               | 76.7   | 68.1   |      |            | No  | No     |                |                          |                  |                                            |
|        |                  |                         |                     |                   |                                      |                      | Cut score 16                                                               | 72.3   | 72.2   |      |            | No  | No     |                |                          |                  |                                            |
|        |                  |                         |                     |                   |                                      |                      | Cut score 15                                                               | 65.1   | 76.1   |      |            | No  | No     |                |                          |                  |                                            |
|        |                  |                         |                     |                   |                                      |                      | Cut score 14                                                               | 52.2   | 81.3   |      |            | No  | No     |                |                          |                  |                                            |
|        |                  |                         |                     |                   |                                      |                      | Cut score 13                                                               | 43.9   | 84.5   |      |            | No  | No     |                |                          |                  |                                            |
|        |                  |                         |                     |                   |                                      |                      | Cut score 12                                                               | 38.9   | 87.4   |      |            | No  | No     |                |                          |                  |                                            |
|        |                  |                         |                     |                   |                                      |                      | Cut score 11                                                               | 32.9   | 89.9   |      |            | No  | No     |                |                          |                  |                                            |
|        |                  |                         |                     |                   |                                      |                      | LM-IR 4 years                                                              |        |        | 0.75 |            | No  | No     |                |                          |                  |                                            |
|        |                  |                         |                     |                   |                                      |                      | Cut score 22                                                               | 88.2   | 41.1   |      |            | No  | No     |                |                          |                  |                                            |
|        |                  |                         |                     |                   |                                      |                      | Cut score 21                                                               | 83.7   | 47.2   |      |            | No  | No     |                |                          |                  |                                            |
|        |                  |                         |                     |                   |                                      |                      | Cut score 20                                                               | 80.4   | 51.9   |      |            | No  | No     |                |                          |                  |                                            |
|        |                  |                         |                     |                   |                                      |                      | Cut score 19                                                               | 76.3   | 58.5   |      |            | No  | No     |                |                          |                  |                                            |
|        |                  |                         |                     |                   |                                      |                      | Cut score 18                                                               | 72.9   | 63.0   |      |            | No  | No     |                |                          |                  |                                            |
|        |                  |                         |                     |                   |                                      |                      | Cut score 17                                                               | 69.8   | 68.7   |      |            | No  | No     |                |                          |                  |                                            |
|        |                  |                         |                     |                   |                                      |                      | Cut score 16                                                               | 66.7   | 72.9   |      |            | No  | No     |                |                          |                  |                                            |
|        |                  |                         |                     |                   |                                      |                      | Cut score 15                                                               | 61.4   | 76.8   |      |            | No  | No     |                |                          |                  |                                            |
|        |                  |                         |                     |                   |                                      |                      | Cut score 14                                                               | 50.8   | 82.1   |      |            | No  | No     |                |                          |                  |                                            |
|        |                  |                         |                     |                   |                                      |                      | Cut score 13                                                               | 44.1   | 85.3   |      |            | No  | No     |                |                          |                  |                                            |
|        |                  |                         |                     |                   |                                      |                      | Cut score 12                                                               | 38.8   | 88.1   |      |            | No  | No     |                |                          |                  |                                            |
|        |                  |                         |                     |                   |                                      |                      | Cut score 11                                                               | 33.0   | 90.6   |      |            | No  | No     |                |                          |                  |                                            |
|        |                  |                         |                     |                   |                                      |                      | FCSRT-FR and LM-IR of the Wechsler Memory Scale-revised. (3 years)         |        |        | 0.85 |            | No  | No     |                |                          |                  |                                            |
|        |                  |                         |                     |                   |                                      |                      | Model 1: FCSRT-FR adjusted for age, sex, education, race                   |        |        |      |            | No  | No     |                |                          |                  |                                            |
|        |                  |                         |                     |                   |                                      |                      | Model 2: Model 1 + LM-IR. Among the subgroup with APOE e4 status available |        |        | 0.86 |            | No  | No     |                |                          |                  |                                            |
|        |                  |                         |                     |                   |                                      |                      | Model 3: FCSRT-FR adjusted for age, sex, education, race;                  |        |        | 0.86 |            | No  | No     |                |                          |                  |                                            |
|        |                  |                         |                     |                   |                                      |                      | Model 4: Model 3 + LM-IR                                                   |        |        | 0.87 |            | No  | No     |                |                          |                  |                                            |
|        |                  |                         |                     |                   |                                      |                      | Model 5: Model 4 + APOE e4 status                                          |        |        | 0.87 |            | No  | No     |                |                          |                  |                                            |

(Continued)

Table 2. (Continued)

| Sample                                                 | Follow-up sample | Number of events (type) | Diagnostic criteria         | Dementia subtypes | Follow-up (years) and follow-up rate                                           | Baseline age (years)                                               | Model                   | Sn (%) | Sp (%) | AUC  | Validation | Cal | Ex val | Follow-up rate     | Dementia subtypes tested | Additional notes | Quality Assessment: Newcastle Ottawa Scale |
|--------------------------------------------------------|------------------|-------------------------|-----------------------------|-------------------|--------------------------------------------------------------------------------|--------------------------------------------------------------------|-------------------------|--------|--------|------|------------|-----|--------|--------------------|--------------------------|------------------|--------------------------------------------|
| Leipzig Longitudinal Study of the Aged (LEILA 75+)(22) | 384              | 28 (dementia)           | DSM-IV (clinical diagnosis) | None              | Average 1.4 years followed up for 5 assessments, followed-up at 3rd assessment | ≥75, dementia cases (mean 85.16), dementia free-cases (mean 83.03) | CDT                     | 21.0   | 97.0   | 0.70 | No         | No  | No     | Follow-up rate 70% | No                       | None             | *****                                      |
|                                                        |                  |                         |                             |                   |                                                                                |                                                                    | CDT = 4                 |        |        |      | No         | No  | No     |                    | No                       |                  |                                            |
|                                                        |                  |                         |                             |                   |                                                                                |                                                                    | CDT ≥3                  | 68.0   | 65.0   |      | No         | No  | No     |                    | No                       |                  |                                            |
|                                                        |                  |                         |                             |                   |                                                                                |                                                                    | CDT = 2                 | 75.0   | 57.0   |      | No         | No  | No     |                    | No                       |                  |                                            |
|                                                        |                  |                         |                             |                   |                                                                                |                                                                    | MCI                     |        |        | 0.77 | No         | No  | No     |                    | No                       |                  |                                            |
| The Leukoar-alosis and Disability (LADIS) Study (10)   | 480              | 90 (dementia)           | DSM-IV                      | No                | 3 years                                                                        | 65–84, dementia cases (mean 75.9), no demented (mean 73.7)         | <b>Batteries</b>        |        |        |      |            |     |        | 75% follow-up rate | No                       | None             | *****                                      |
|                                                        |                  |                         |                             |                   |                                                                                |                                                                    | MMSE                    | 29.0   | 87.0   | 0.79 | No         | No  | No     |                    | No                       |                  |                                            |
|                                                        |                  |                         |                             |                   |                                                                                |                                                                    | ADAS-Cog                | 20.0   | 84.0   | 0.79 | No         | No  | No     |                    | No                       |                  |                                            |
|                                                        |                  |                         |                             |                   |                                                                                |                                                                    | VADAS                   | 25.0   | 88.0   | 0.82 | No         | No  | No     |                    | No                       |                  |                                            |
|                                                        |                  |                         |                             |                   |                                                                                |                                                                    | VADAS extension         | 8.0    | 82.0   | 0.79 | No         | No  | No     |                    | No                       |                  |                                            |
|                                                        |                  |                         |                             |                   |                                                                                |                                                                    | <b>Single Tests</b>     |        |        |      | No         | No  | No     |                    | No                       |                  |                                            |
|                                                        |                  |                         |                             |                   |                                                                                |                                                                    | Trail-making (Part B-A) |        | 86.0   | 0.70 | No         | No  | No     |                    | No                       |                  |                                            |
|                                                        |                  |                         |                             |                   |                                                                                |                                                                    | Stroop (part 3-2)       | 62.0   | 86.0   | 0.69 | No         | No  | No     |                    | No                       |                  |                                            |
|                                                        |                  |                         |                             |                   |                                                                                |                                                                    | Word immediate recall   | 71.0   | 85.0   | 0.68 | No         | No  | No     |                    | No                       |                  |                                            |
|                                                        |                  |                         |                             |                   |                                                                                |                                                                    | Delayed recall          | 20.0   | 85.0   | 0.71 | No         | No  | No     |                    | No                       |                  |                                            |
|                                                        |                  |                         |                             |                   |                                                                                |                                                                    | Word recognition        | 54.0   | 85.0   | 0.69 | No         | No  | No     |                    | No                       |                  |                                            |
|                                                        |                  |                         |                             |                   |                                                                                |                                                                    | Constructional Praxis   |        | 85.0   | 0.62 | No         | No  | No     |                    | No                       |                  |                                            |
|                                                        |                  |                         |                             |                   |                                                                                |                                                                    | Ideational praxis       | 40.0   | 85.0   | 0.59 | No         | No  | No     |                    | No                       |                  |                                            |
|                                                        |                  |                         |                             |                   |                                                                                |                                                                    | Naming                  |        | 84.0   | 0.56 | No         | No  | No     |                    | No                       |                  |                                            |
|                                                        |                  |                         |                             |                   |                                                                                |                                                                    | Orientation             | 65.0   | 84.0   | 0.70 | No         | No  | No     |                    | No                       |                  |                                            |
|                                                        |                  |                         |                             |                   |                                                                                |                                                                    | Symbol digit            | 68.0   | 87.0   | 0.78 | No         | No  | No     |                    | No                       |                  |                                            |
|                                                        |                  |                         |                             |                   |                                                                                |                                                                    | Digit Span              | 50.0   | 85.0   | 0.64 | No         | No  | No     |                    | No                       |                  |                                            |
|                                                        |                  |                         |                             |                   |                                                                                |                                                                    | Digit cancellation      | 55.0   | 86.0   | 0.73 | No         | No  | No     |                    | No                       |                  |                                            |
|                                                        |                  |                         |                             |                   |                                                                                |                                                                    | Maze                    | 58.0   | 86.0   | 0.71 | No         | No  | No     |                    | No                       |                  |                                            |
|                                                        |                  |                         |                             |                   |                                                                                |                                                                    | Verbal Fluency          | 45.0   | 86.0   | 0.75 | No         | No  | No     |                    | No                       |                  |                                            |

(Continued)

Table 2. (Continued)

| Sample                                                                                   | Follow-up sample | Number of events (type) | Diagnostic criteria                                                           | Dementia subtypes                                                                                                                                        | Follow-up (years) and follow-up rate | Baseline age (years)            | Model                                      | Sn (%) | Sp (%) | AUC  | Validation | Cal | Ex val | Follow-up rate     | Dementia subtypes tested | Additional notes                                                                                                                                            | Quality Assessment: Newcastle Ottawa Scale |
|------------------------------------------------------------------------------------------|------------------|-------------------------|-------------------------------------------------------------------------------|----------------------------------------------------------------------------------------------------------------------------------------------------------|--------------------------------------|---------------------------------|--------------------------------------------|--------|--------|------|------------|-----|--------|--------------------|--------------------------|-------------------------------------------------------------------------------------------------------------------------------------------------------------|--------------------------------------------|
| African American and Caucasian Primary Care Patients (Geriatric Ambulatory Practice)(11) | 194              | 28 (dementia)           | DSM-IV (clinical diagnosis)                                                   | AD and non-AD dementia, 11 probable AD, 12 possible AD, 9 mixed (AD and VaD), 10 with VaD, 6 with other dementias, 2 insufficient evidence for subtyping | Median 2.6 years                     | Mean 78.3                       | FCSRT-FR                                   |        | 0.81   | No   | No         | No  | No     | No statement       | No                       | Non-AD (n = 16) Total Recall = 45.0 AD recall; Non-AD Free recall 21.5. AD free recall = 17.5 (no difference between non-AD and AD in free recall p = 0.063 | *****                                      |
| Medical Research Council Cognitive Function and Ageing Study (MRC CFAS) (12)             | 1347             | 137 (dementia)          | AGECAT organicity rating case level of $\geq 3$ (equivalent to 0.72DSM-III-R) | No                                                                                                                                                       | 2 years                              | No dementia 74.7, dementia 80.5 | FCSRT-TR                                   | 81.0   | 66.0   | 0.74 | No         | No  | No     | 66% follow-up rate | No                       | None                                                                                                                                                        | *****                                      |
|                                                                                          |                  |                         |                                                                               |                                                                                                                                                          |                                      |                                 | Memory (recent range 0–4)                  | 73.0   | 71.0   | 0.72 | No         | No  | No     | No                 | No                       |                                                                                                                                                             |                                            |
|                                                                                          |                  |                         |                                                                               |                                                                                                                                                          |                                      |                                 | Memory (learning range 0–17)               | 63.0   | 78.0   | 0.71 | No         | No  | No     | No                 | No                       |                                                                                                                                                             |                                            |
|                                                                                          |                  |                         |                                                                               |                                                                                                                                                          |                                      |                                 | Orientation (range 0–10)                   | 91.0   | 40.0   | 0.65 | No         | No  | No     | No                 | No                       |                                                                                                                                                             |                                            |
|                                                                                          |                  |                         |                                                                               |                                                                                                                                                          |                                      |                                 | Language comprehension (range 0–9)         | 96.0   | 16.0   | 0.63 | No         | No  | No     | No                 | No                       |                                                                                                                                                             |                                            |
|                                                                                          |                  |                         |                                                                               |                                                                                                                                                          |                                      |                                 | Language expression (range 0–21)           | 87.0   | 42.0   | 0.65 | No         | No  | No     | No                 | No                       |                                                                                                                                                             |                                            |
|                                                                                          |                  |                         |                                                                               |                                                                                                                                                          |                                      |                                 | Attention and calculation (range 0–8)      | 71.0   | 58.0   | 0.67 | No         | No  | No     | No                 | No                       |                                                                                                                                                             |                                            |
|                                                                                          |                  |                         |                                                                               |                                                                                                                                                          |                                      |                                 | Praxis (range 0–8)                         | 90.0   | 34.0   | 0.68 | No         | No  | No     | No                 | No                       |                                                                                                                                                             |                                            |
|                                                                                          |                  |                         |                                                                               |                                                                                                                                                          |                                      |                                 | Abstraction (range 0–8)                    | 64.0   | 62.0   | 0.63 | No         | No  | No     | No                 | No                       |                                                                                                                                                             |                                            |
|                                                                                          |                  |                         |                                                                               |                                                                                                                                                          |                                      |                                 | Perception (range 0–8)                     | 78.0   | 53.0   | 0.65 | No         | No  | No     | No                 | No                       |                                                                                                                                                             |                                            |
|                                                                                          |                  |                         |                                                                               |                                                                                                                                                          |                                      |                                 | Composite score (CAMCOG total range 0–103) | 72.0   | 80.0   | 0.76 | No         | No  | No     | No                 | No                       |                                                                                                                                                             |                                            |
|                                                                                          |                  |                         |                                                                               |                                                                                                                                                          |                                      |                                 | Composite score (Memory 0–27)              | 76.0   | 77.0   | 0.77 | No         | No  | No     | No                 | No                       |                                                                                                                                                             |                                            |
|                                                                                          |                  |                         |                                                                               |                                                                                                                                                          |                                      |                                 | Composite score (non-memory range 0–76)    | 65.0   | 79.0   | 0.72 | No         | No  | No     | No                 | No                       |                                                                                                                                                             |                                            |
| (3) Multivariable Models                                                                 |                  |                         |                                                                               |                                                                                                                                                          |                                      |                                 |                                            |        |        |      |            |     |        |                    |                          |                                                                                                                                                             |                                            |

(Continued)

Table 2. (Continued)

| Sample                                                                                                                 | Follow-up sample | Number of events (type)      | Diagnostic criteria                                           | Dementia subtypes | Follow-up (years) and follow-up rate                   | Baseline age (years)                                             | Model                                                                                                                                       | Sn (%) | Sp (%) | AUC  | Validation | Cal                                  | Ex val | Follow-up rate                                 | Dementia subtypes tested | Additional notes                                                                                                                                                                     | Quality Assessment: Newcastle Ottawa Scale |
|------------------------------------------------------------------------------------------------------------------------|------------------|------------------------------|---------------------------------------------------------------|-------------------|--------------------------------------------------------|------------------------------------------------------------------|---------------------------------------------------------------------------------------------------------------------------------------------|--------|--------|------|------------|--------------------------------------|--------|------------------------------------------------|--------------------------|--------------------------------------------------------------------------------------------------------------------------------------------------------------------------------------|--------------------------------------------|
| Type 2 diabetes patients from the Kaiser Permanente Northern California (KPNC) Diabetes Registry, Oakland, CA, USA(13) | 29 961           | 5173 (dementia)              | ICD-9 codes for dementia                                      | No                | 10 years                                               | ≥60, dementia cases (mean 74.2), dementia free cases (mean 69.7) | Age, education, microvascular disease, diabetic foot, cerebrovascular disease, cardiovascular disease, acute metabolic event and depression |        | 0.74   | No   | No         | Yes, Hosmer-Lemeshow $\chi^2 = 15.1$ | Yes    | 48% died, 24% had been diagnosed with dementia | No                       | External validation: Cohort of 2413 patients (aged .60 years) with type 2 diabetes who are members of the Pathways study cohort from Washington, USA. AUC for validation cohort 0.75 | *****                                      |
| German Study on Aging and Cognition and Dementia in Primary Care patients (AgeCoDe)(19)                                | 3055             | 193 (AD)                     | DSM-IV (clinical diagnosis) for dementia: NINCDS-ADRDA for AD | AD                | 3 follow-ups at 18 month intervals Mean follow-up 3.81 | ≥75, mean 80.1                                                   | Full model: age, sex, SMI, verbal fluency, delayed recall, MMSE, IADL                                                                       | 85.5   | 63.8   | 0.84 | Yes        | No                                   | No     | 86.2% follow-up rate                           | No                       | AUC for validation cohort 0.79 (non-significant compared to first cohort).                                                                                                           | *****                                      |
| Vienna TransDi-nube Aging (VITA) Study (24)                                                                            | 296              | 65 (possible or probable AD) | NINCDS-ADRDA for AD                                           | AD                | 60 months                                              | 75, no AD mean 75.7, AD mean 75.7                                | Full model: age, sex, SMI, verbal fluency, delayed recall, MMSE, IADL, +ApoE4 status                                                        |        | 0.51   | No   | No         | No                                   | No     | 67% follow-up rate                             | No                       | In logistic regression only A2 significant, but only 12 patients had a positive value for loss of interest                                                                           | *****                                      |
|                                                                                                                        |                  |                              |                                                               |                   |                                                        |                                                                  |                                                                                                                                             | 10.4   | 97.8   | 0.54 | No         | No                                   | No     | No                                             | No                       |                                                                                                                                                                                      |                                            |
|                                                                                                                        |                  |                              |                                                               |                   |                                                        |                                                                  |                                                                                                                                             |        |        | 0.50 | No         | No                                   | No     | No                                             | No                       |                                                                                                                                                                                      |                                            |
|                                                                                                                        |                  |                              |                                                               |                   |                                                        |                                                                  |                                                                                                                                             |        |        | 0.53 | No         | No                                   | No     | No                                             | No                       |                                                                                                                                                                                      |                                            |
|                                                                                                                        |                  |                              |                                                               |                   |                                                        |                                                                  |                                                                                                                                             |        |        | 0.52 | No         | No                                   | No     | No                                             | No                       |                                                                                                                                                                                      |                                            |
|                                                                                                                        |                  |                              |                                                               |                   |                                                        |                                                                  |                                                                                                                                             |        |        | 0.51 | No         | No                                   | No     | No                                             | No                       |                                                                                                                                                                                      |                                            |
|                                                                                                                        |                  |                              |                                                               |                   |                                                        |                                                                  |                                                                                                                                             |        |        | 0.50 | No         | No                                   | No     | No                                             | No                       |                                                                                                                                                                                      |                                            |
|                                                                                                                        |                  |                              |                                                               |                   |                                                        |                                                                  |                                                                                                                                             |        |        | 0.50 | No         | No                                   | No     | No                                             | No                       |                                                                                                                                                                                      |                                            |
|                                                                                                                        |                  |                              |                                                               |                   |                                                        |                                                                  |                                                                                                                                             |        |        | 0.63 | No         | No                                   | No     | No                                             | No                       |                                                                                                                                                                                      |                                            |

(Continued)

Table 2. (Continued)

| Sample                                                       | Follow-up sample | Number of events (type)                         | Diagnostic criteria                                                                                                                           | Dementia subtypes      | Follow-up (years) and follow-up rate           | Baseline age (years)                | Model                                                                                                                                                                           | Sn (%) | Sp (%) | AUC Validation | Cal | Ex val | Follow-up rate      | Dementia subtypes tested | Additional notes                                                                                                                                               | Quality Assessment: Newcastle Ottawa Scale |
|--------------------------------------------------------------|------------------|-------------------------------------------------|-----------------------------------------------------------------------------------------------------------------------------------------------|------------------------|------------------------------------------------|-------------------------------------|---------------------------------------------------------------------------------------------------------------------------------------------------------------------------------|--------|--------|----------------|-----|--------|---------------------|--------------------------|----------------------------------------------------------------------------------------------------------------------------------------------------------------|--------------------------------------------|
| The Hisayama Study, Japan (15)                               | 523              | 136                                             | DSM-III-R                                                                                                                                     | Mixed 8, AD 81, VaD 39 | 17 years                                       | Mean 66.8                           | MODEL: Age + sex + education + smoking + alcohol intake + systolic blood pressure + use of antihypertensive agents + HbA1c + serum total cholesterol + BMI and regular exercise | 0.68   | No     | No             | No  | No     | No statement        | No                       | Net reclassification improvement: 0.18, (P<0.01); integrated discrimination improvement: 6.25, P<0.001) also confirmed this improvement in AD risk assessment. | *****                                      |
| Medicare Recipients 65 + in Northern Manhattan, New York(16) | 1051             | 92 possible and probable LOAD, 80 probably LOAD | DSM-IV. Possible LOAD: when most likely LOAD but could be other disorders. Probable LOAD: dementia could not be explained by another disorder | LOAD                   | Mean follow-up 4.2 years at 18 month intervals | 75.66 without LOAD, 79.74 with LOAD | Demographic (Age, sex, education, ethnicity) + Health (Diabetes, hypertension, HDL-C, waist-to-hip ratio) + Lifestyle (Smoking)                                                 | 0.79   | No     | No             | No  | No     | >80% follow-up rate | No                       | None                                                                                                                                                           | *****                                      |
| Rotterdam Study(17)                                          | 5700             | 462                                             | DSM-III or DSM-IV for dementia and NINCDS-ADRDA for AD                                                                                        | AD                     | Mean 9.3 years                                 | 69                                  | Demographics + APOE                                                                                                                                                             | 0.75   | No     | No             | No  | No     | No statement        | No                       | None                                                                                                                                                           | *****                                      |
| Cardiovascular Health Study (17)                             | 2429             | 435                                             |                                                                                                                                               | AD                     | Mean 6.8 years                                 | 75                                  | Age, sex, APOE e4                                                                                                                                                               | 0.85   | No     | No             | No  | No     | No                  | No                       | None                                                                                                                                                           | *****                                      |
| Rotterdam Study(18)                                          | 5507             | 359 (AD)                                        | DSM-III-R for dementia: NINCDS-ADRDA for AD                                                                                                   | AD                     | 10 years                                       | 45–99                               | Model 1 (age and sex)                                                                                                                                                           | 0.79   | No     | No             | No  | No     | >80% follow-up rate | No                       | None                                                                                                                                                           | *****                                      |

(Continued)

Table 2. (Continued)

| Sample                                     | Follow-up sample | Number of events (type) | Diagnostic criteria                                           | Dementia subtypes | Follow-up (years) and follow-up rate | Baseline age (years) | Model                                                                                                                                                                                                                                                                                                                                                     | Sn (%) | Sp (%) | AUC | Validation | Cal | Ex val | Follow-up rate | Dementia subtypes tested | Additional notes | Quality Assessment: Newcastle Ottawa Scale |  |
|--------------------------------------------|------------------|-------------------------|---------------------------------------------------------------|-------------------|--------------------------------------|----------------------|-----------------------------------------------------------------------------------------------------------------------------------------------------------------------------------------------------------------------------------------------------------------------------------------------------------------------------------------------------------|--------|--------|-----|------------|-----|--------|----------------|--------------------------|------------------|--------------------------------------------|--|
|                                            |                  |                         |                                                               |                   |                                      |                      | Model II (age, sex and APOE e4 carriership)                                                                                                                                                                                                                                                                                                               | 0.81   | No     | No  | No         | No  | No     | No             | No                       |                  |                                            |  |
|                                            |                  |                         |                                                               |                   |                                      |                      | Model III (age, sex, APOE e4 carriership, genetic risk* score without APOE)                                                                                                                                                                                                                                                                               | 0.82   | No     | No  | No         | No  | No     | No             | No                       |                  |                                            |  |
| Cardiovascular Health Cognition Study (21) | 3252             | 451                     | Review committee of neurologists and psychiatrists (clinical) | None              | 6 years                              | Not specified        | Age (75–79 and 80–100). Delayed recall <2 of 3 words, incorrectly copying intersecting pentagons, incorrectly taking or folding paper, inability to name 10 four legged animals in 30s, self-reported "trouble keeping mind on things" > = 3 d/wk, stroke, peripheral arterial disease, CABG, BMI <18.5, lack of current alcohol consumption, constant    | 0.77   | No     | No  | No         | No  | No     | No statement   | No                       | None             | ****                                       |  |
|                                            |                  |                         |                                                               |                   |                                      |                      | Age (continuous variable), Delayed recall <2 of 3 words, incorrectly copying intersecting pentagons, incorrectly taking or folding paper, inability to name 10 four legged animals in 30s, self-reported "trouble keeping mind on things" > = 3 d/wk, stroke, peripheral arterial disease, CABG, BMI <18.5, lack of current alcohol consumption, constant | 0.78   | No     | No  | No         | No  | No     | No             | No                       |                  |                                            |  |

(Continued)

Table 2. (Continued)

| Sample                                                                    | Follow-up sample | Number of events (type) | Diagnostic criteria | Dementia subtypes | Follow-up (years) and follow-up rate | Baseline age (years) | Model                                                                                                                                                                                                                                                                                                                                                                | Sn (%) | Sp (%) | AUC  | Validation | Cal                  | Ex val | Follow-up rate | Dementia subtypes tested | Additional notes                                                                                                                                   | Quality Assessment: Newcastle Ottawa Scale |
|---------------------------------------------------------------------------|------------------|-------------------------|---------------------|-------------------|--------------------------------------|----------------------|----------------------------------------------------------------------------------------------------------------------------------------------------------------------------------------------------------------------------------------------------------------------------------------------------------------------------------------------------------------------|--------|--------|------|------------|----------------------|--------|----------------|--------------------------|----------------------------------------------------------------------------------------------------------------------------------------------------|--------------------------------------------|
| Kaiser Permanente Medical Care Program of Northern California (KPNC) (14) | 9480             | 2767                    | ICD-9               | None              | 36.3 years                           | 40–55 (mean 46.1)    | Age 75–79, Age 80–100, Delayed recall <2 of 3 words, incorrectly copying intersecting pentagons, incorrectly taking or folding paper, inability to name 10 four legged animals in 30s, self-reported "trouble keeping mind on things" > = 3 d/wk, stroke, peripheral arterial disease, CABG, BMK <18.5, lack of current alcohol consumption, walking speed, constant | 0.78   | No     | No   | No         | No                   | No     | No             | None                     | Note: this paper is an external validation of the original CAIDE score; No improvement of NRI or IDI with additional variables, similar to the AUC | *****                                      |
| <u>Logistic Analysis</u>                                                  |                  |                         |                     |                   |                                      |                      |                                                                                                                                                                                                                                                                                                                                                                      |        |        |      |            |                      |        |                |                          |                                                                                                                                                    |                                            |
|                                                                           |                  |                         |                     |                   |                                      |                      | CAIDE (age, education, sex, cholesterol, BMI, systolic blood pressure)                                                                                                                                                                                                                                                                                               | 0.75   |        | 0.75 | Yes        | Yes, Hosmer-Lemeshow | Yes    | No             | statement                |                                                                                                                                                    |                                            |
|                                                                           |                  |                         |                     |                   |                                      |                      | CAIDE                                                                                                                                                                                                                                                                                                                                                                | 0.75   |        | 0.75 |            |                      |        |                |                          |                                                                                                                                                    |                                            |
|                                                                           |                  |                         |                     |                   |                                      |                      | CAIDE (Asian)                                                                                                                                                                                                                                                                                                                                                        | 0.81   |        | 0.81 |            |                      |        |                |                          |                                                                                                                                                    |                                            |
|                                                                           |                  |                         |                     |                   |                                      |                      | CAIDE (Black)                                                                                                                                                                                                                                                                                                                                                        | 0.75   |        | 0.75 |            |                      |        |                |                          |                                                                                                                                                    |                                            |
|                                                                           |                  |                         |                     |                   |                                      |                      | CAIDE (White)                                                                                                                                                                                                                                                                                                                                                        | 0.74   |        | 0.74 |            |                      |        |                |                          |                                                                                                                                                    |                                            |
|                                                                           |                  |                         |                     |                   |                                      |                      | CAIDE + central obesity                                                                                                                                                                                                                                                                                                                                              | 0.75   |        | 0.75 |            |                      |        |                |                          |                                                                                                                                                    |                                            |
|                                                                           |                  |                         |                     |                   |                                      |                      | CAIDE + depressed mood                                                                                                                                                                                                                                                                                                                                               | 0.75   |        | 0.75 |            |                      |        |                |                          |                                                                                                                                                    |                                            |
|                                                                           |                  |                         |                     |                   |                                      |                      | CAIDE + diabetes mellitus                                                                                                                                                                                                                                                                                                                                            | 0.75   |        | 0.75 |            |                      |        |                |                          |                                                                                                                                                    |                                            |
|                                                                           |                  |                         |                     |                   |                                      |                      | CAIDE + head trauma                                                                                                                                                                                                                                                                                                                                                  | 0.75   |        | 0.75 |            |                      |        |                |                          |                                                                                                                                                    |                                            |
|                                                                           |                  |                         |                     |                   |                                      |                      | CAIDE + poor lung function                                                                                                                                                                                                                                                                                                                                           | 0.75   |        | 0.75 |            |                      |        |                |                          |                                                                                                                                                    |                                            |
|                                                                           |                  |                         |                     |                   |                                      |                      | CAIDE + smoking                                                                                                                                                                                                                                                                                                                                                      | 0.75   |        | 0.75 |            |                      |        |                |                          |                                                                                                                                                    |                                            |
|                                                                           |                  |                         |                     |                   |                                      |                      | <u>Cox Analysis</u>                                                                                                                                                                                                                                                                                                                                                  |        |        |      |            |                      |        |                |                          |                                                                                                                                                    |                                            |
|                                                                           |                  |                         |                     |                   |                                      |                      | CAIDE                                                                                                                                                                                                                                                                                                                                                                | 0.67   |        | 0.67 |            |                      |        |                |                          |                                                                                                                                                    |                                            |
|                                                                           |                  |                         |                     |                   |                                      |                      | CAIDE + central obesity                                                                                                                                                                                                                                                                                                                                              | 0.67   |        | 0.67 |            |                      |        |                |                          |                                                                                                                                                    |                                            |

(Continued)



Table 2. (Continued)

| Sample                                                                                                                                                    | Follow-up sample                          | Number of events (type) | Diagnostic criteria                                                                                                                                                                                                                               | Dementia subtypes | Follow-up (years) and follow-up rate | Baseline age (years) | Model                                                                                                                                                                                         | Sn (%) | Sp (%) | AUC | Validation | Cal | Ex val | Follow-up rate | Dementia subtypes tested | Additional notes                                                                                                                    | Quality Assessment: Newcastle Ottawa Scale |
|-----------------------------------------------------------------------------------------------------------------------------------------------------------|-------------------------------------------|-------------------------|---------------------------------------------------------------------------------------------------------------------------------------------------------------------------------------------------------------------------------------------------|-------------------|--------------------------------------|----------------------|-----------------------------------------------------------------------------------------------------------------------------------------------------------------------------------------------|--------|--------|-----|------------|-----|--------|----------------|--------------------------|-------------------------------------------------------------------------------------------------------------------------------------|--------------------------------------------|
|                                                                                                                                                           |                                           |                         |                                                                                                                                                                                                                                                   |                   |                                      |                      | CAIDE + depressed mood                                                                                                                                                                        |        | 0.67   |     |            |     |        |                |                          |                                                                                                                                     |                                            |
|                                                                                                                                                           |                                           |                         |                                                                                                                                                                                                                                                   |                   |                                      |                      | CAIDE + diabetes mellitus                                                                                                                                                                     |        | 0.67   |     |            |     |        |                |                          |                                                                                                                                     |                                            |
|                                                                                                                                                           |                                           |                         |                                                                                                                                                                                                                                                   |                   |                                      |                      | CAIDE + head trauma                                                                                                                                                                           |        | 0.67   |     |            |     |        |                |                          |                                                                                                                                     |                                            |
|                                                                                                                                                           |                                           |                         |                                                                                                                                                                                                                                                   |                   |                                      |                      | CAIDE + poor lung function                                                                                                                                                                    |        | 0.67   |     |            |     |        |                |                          |                                                                                                                                     |                                            |
|                                                                                                                                                           |                                           |                         |                                                                                                                                                                                                                                                   |                   |                                      |                      | CAIDE + smoking                                                                                                                                                                               |        | 0.67   |     |            |     |        |                |                          |                                                                                                                                     |                                            |
| Cardiovascular Health Study (CHS), Framingham Heart Study (FHS), the Health and Retirement Study (HRS), Sacramento Area Latino Study on Aging (SALSA)(20) | CHS 2794, FHS 2411, HRS 13889, SALSA 1125 | Not stated              | Cognitive impairment in at least two domains that reflected a decline from prior levels and sufficient severity to affect daily function (CHS, FHS and SALSA —Consensus Committee Review, HRS, validated cut points on a brief cognitive battery) | No                | 6 years                              | 71–73                | Age, education, history of stroke, diabetes mellitus, BMI, assistance needed with money or medications, depressive symptoms                                                                   |        |        | Yes | Yes        | No  | No     | No             | No                       | Predictive factors identified in each study predictive of dementia. Those that were consistent between cohorts used in final model. | *****                                      |
|                                                                                                                                                           |                                           |                         |                                                                                                                                                                                                                                                   |                   |                                      |                      | CHS Cohort                                                                                                                                                                                    |        | 0.68   |     |            |     |        |                |                          |                                                                                                                                     |                                            |
|                                                                                                                                                           |                                           |                         |                                                                                                                                                                                                                                                   |                   |                                      |                      | CHS (whites)                                                                                                                                                                                  |        | 0.70   |     |            |     |        |                |                          |                                                                                                                                     |                                            |
|                                                                                                                                                           |                                           |                         |                                                                                                                                                                                                                                                   |                   |                                      |                      | CHS (blacks)                                                                                                                                                                                  |        | 0.65   |     |            |     |        |                |                          |                                                                                                                                     |                                            |
|                                                                                                                                                           |                                           |                         |                                                                                                                                                                                                                                                   |                   |                                      |                      | FHS cohort                                                                                                                                                                                    |        | 0.77   |     |            |     |        |                |                          |                                                                                                                                     |                                            |
|                                                                                                                                                           |                                           |                         |                                                                                                                                                                                                                                                   |                   |                                      |                      | HRS cohort                                                                                                                                                                                    |        | 0.76   |     |            |     |        |                |                          |                                                                                                                                     |                                            |
|                                                                                                                                                           |                                           |                         |                                                                                                                                                                                                                                                   |                   |                                      |                      | HRS (whites)                                                                                                                                                                                  |        | 0.75   |     |            |     |        |                |                          |                                                                                                                                     |                                            |
|                                                                                                                                                           |                                           |                         |                                                                                                                                                                                                                                                   |                   |                                      |                      | HRS (blacks)                                                                                                                                                                                  |        | 0.70   |     |            |     |        |                |                          |                                                                                                                                     |                                            |
|                                                                                                                                                           |                                           |                         |                                                                                                                                                                                                                                                   |                   |                                      |                      | HRS (Latino)                                                                                                                                                                                  |        | 0.71   |     |            |     |        |                |                          |                                                                                                                                     |                                            |
|                                                                                                                                                           |                                           |                         |                                                                                                                                                                                                                                                   |                   |                                      |                      | SALSA cohort                                                                                                                                                                                  |        | 0.78   |     |            |     |        |                |                          |                                                                                                                                     |                                            |
| Cardiovascular Health Study (CHS), Framingham Heart Study (FHS), the Health and Retirement Study (HRS), Sacramento Area Latino Study on Aging (SALSA)(20) | CHS 2794, FHS 2411, HRS 13889, SALSA 1125 | Not stated              | Cognitive impairment in at least two domains that reflected a decline from prior levels and sufficient severity to affect daily function (CHS, FHS and SALSA —Consensus Committee Review, HRS, validated cut points on a brief cognitive battery) | No                | 6 years                              | 71–73                | ANU-ADRI (age, gender, education, diabetes, traumatic brain injury, cognitive activity, social network and engagement, smoking, alcohol, physical activity, fish intake, depression symptoms) |        |        | Yes | No         | No  | No     | No             | AD for CAIDE             | 3 separate validation cohorts used for original ANU-ADRI Risk Index Ex val of CAIDE index                                           | *****                                      |
|                                                                                                                                                           |                                           |                         |                                                                                                                                                                                                                                                   |                   |                                      |                      | MAP (ANU-ADRI minus fish intake and depressive symptoms)                                                                                                                                      |        | 0.73   |     |            |     |        |                |                          |                                                                                                                                     |                                            |

(Continued)

Table 2. (Continued)

| Sample | Follow-up sample | Number of events (type) | Diagnostic criteria | Dementia subtypes | Follow-up (years) and follow-up rate | Baseline age (years) | Model                                                                                           | Sn (%) | Sp (%) | AUC Validation | Cal | Ex val | Follow-up rate | Dementia subtypes tested | Additional notes | Quality Assessment: Newcastle Ottawa Scale |
|--------|------------------|-------------------------|---------------------|-------------------|--------------------------------------|----------------------|-------------------------------------------------------------------------------------------------|--------|--------|----------------|-----|--------|----------------|--------------------------|------------------|--------------------------------------------|
|        |                  |                         |                     |                   |                                      |                      | KP (ANU-ADRI minus cognitive activity, physical activity, fish intake and depressive symptoms). |        |        | 0.64           |     |        |                |                          |                  |                                            |
|        |                  |                         |                     |                   |                                      |                      | CVHS (ANU-ADRI minus traumatic brain injury, cognitive activity, social network and engagement) |        |        | 0.74           |     |        |                |                          |                  |                                            |
|        |                  |                         |                     |                   |                                      |                      | Common variables (age, sex, education, diabetes, smoking and alcohol)                           |        |        |                |     |        |                |                          |                  |                                            |
|        |                  |                         |                     |                   |                                      |                      | MAP                                                                                             |        |        | 0.73           |     |        |                |                          |                  |                                            |
|        |                  |                         |                     |                   |                                      |                      | KP                                                                                              |        |        | 0.67           |     |        |                |                          |                  |                                            |
|        |                  |                         |                     |                   |                                      |                      | CVHS                                                                                            |        |        | 0.69           |     |        |                |                          |                  |                                            |
|        |                  |                         |                     |                   |                                      |                      | CAIDE (AD)                                                                                      |        |        |                |     |        |                |                          |                  |                                            |
|        |                  |                         |                     |                   |                                      |                      | MAP                                                                                             |        |        | 0.49           |     |        |                |                          |                  |                                            |
|        |                  |                         |                     |                   |                                      |                      | KP                                                                                              |        |        | 0.53           |     |        |                |                          |                  |                                            |
|        |                  |                         |                     |                   |                                      |                      | CVHS                                                                                            |        |        | 0.57           |     |        |                |                          |                  |                                            |
|        |                  |                         |                     |                   |                                      |                      | CAIDE (Dementia NOS)                                                                            |        |        |                |     |        |                |                          |                  |                                            |
|        |                  |                         |                     |                   |                                      |                      | MAP                                                                                             |        |        | 0.49           |     |        |                |                          |                  |                                            |
|        |                  |                         |                     |                   |                                      |                      | KP                                                                                              |        |        | 0.54           |     |        |                |                          |                  |                                            |
|        |                  |                         |                     |                   |                                      |                      | CVHS                                                                                            |        |        | 0.57           |     |        |                |                          |                  |                                            |
|        |                  |                         |                     |                   |                                      |                      | CAIDE (minus BMI) (AD)                                                                          |        |        |                |     |        |                |                          |                  |                                            |
|        |                  |                         |                     |                   |                                      |                      | MAP                                                                                             |        |        | 0.54           |     |        |                |                          |                  |                                            |
|        |                  |                         |                     |                   |                                      |                      | KP                                                                                              |        |        | 0.53           |     |        |                |                          |                  |                                            |
|        |                  |                         |                     |                   |                                      |                      | CVHS                                                                                            |        |        | 0.58           |     |        |                |                          |                  |                                            |
|        |                  |                         |                     |                   |                                      |                      | CAIDE (minus BMI) (Dementia NOS)                                                                |        |        |                |     |        |                |                          |                  |                                            |
|        |                  |                         |                     |                   |                                      |                      | MAP                                                                                             |        |        | 0.54           |     |        |                |                          |                  |                                            |
|        |                  |                         |                     |                   |                                      |                      | KP                                                                                              |        |        | 0.54           |     |        |                |                          |                  |                                            |
|        |                  |                         |                     |                   |                                      |                      | CVHS                                                                                            |        |        | 0.59           |     |        |                |                          |                  |                                            |
|        |                  |                         |                     |                   |                                      |                      | CAIDE (minus BMI and cholesterol) (AD)                                                          |        |        |                |     |        |                |                          |                  |                                            |
|        |                  |                         |                     |                   |                                      |                      | MAP                                                                                             |        |        | 0.55           |     |        |                |                          |                  |                                            |
|        |                  |                         |                     |                   |                                      |                      | KP                                                                                              |        |        |                |     |        |                |                          |                  |                                            |
|        |                  |                         |                     |                   |                                      |                      | CVHS                                                                                            |        |        | 0.58           |     |        |                |                          |                  |                                            |

(Continued)

Table 2. (Continued)

| Sample                                         | Follow-up sample | Number of events (type)                                                   | Diagnostic criteria    | Dementia subtypes | Follow-up (years) and follow-up rate | Baseline age (years) | Model                                                                                                    | Sn (%) | Sp (%) | AUC  | Validation | Cal | Ex val | Follow-up rate | Dementia subtypes tested | Additional notes | Quality Assessment: Newcastle Ottawa Scale |
|------------------------------------------------|------------------|---------------------------------------------------------------------------|------------------------|-------------------|--------------------------------------|----------------------|----------------------------------------------------------------------------------------------------------|--------|--------|------|------------|-----|--------|----------------|--------------------------|------------------|--------------------------------------------|
|                                                |                  |                                                                           |                        |                   |                                      |                      | CAIDE (minus BMI and cholesterol) (Dementia NOS)                                                         |        |        | 0.55 |            |     |        |                |                          |                  |                                            |
|                                                |                  |                                                                           |                        |                   |                                      |                      | MAP                                                                                                      |        |        |      |            |     |        |                |                          |                  |                                            |
|                                                |                  |                                                                           |                        |                   |                                      |                      | KP                                                                                                       |        |        |      |            |     |        |                |                          |                  |                                            |
|                                                |                  |                                                                           |                        |                   |                                      |                      | CVHS                                                                                                     |        |        | 0.60 |            |     |        |                | AD                       | None             | ****                                       |
| Canadian Study of Health and Aging (CSHA) (25) | 7239             | 194 AD at 5 years<br>106 dementia NOS, 222 at 10 years<br>85 dementia NOS | NINCDS-ADRA, DSM-III-R | AD                | 5 and 10 years                       | ≥65                  | Frailty Index, Non-traditional Risk Factors Index (FI-NTRF) (19 variables of health measures (deficits)) |        |        | 0.64 | No         | No  | No     | Not stated     |                          |                  |                                            |
|                                                |                  |                                                                           |                        |                   |                                      |                      | 5 years AD                                                                                               |        |        | 0.66 | No         | No  | No     | Not stated     |                          |                  |                                            |
|                                                |                  |                                                                           |                        |                   |                                      |                      | 10 years AD                                                                                              |        |        | 0.66 | No         | No  | No     | Not stated     |                          |                  |                                            |
|                                                |                  |                                                                           |                        |                   |                                      |                      | 5 years dementia NOS                                                                                     |        |        | 0.64 | No         | No  | No     | Not stated     |                          |                  |                                            |
|                                                |                  |                                                                           |                        |                   |                                      |                      | 10 years dementia NOS                                                                                    |        |        | 0.66 | No         | No  | No     | Not stated     |                          |                  |                                            |

\* Genetic Risk Score includes the following: CLU, PICALM, BIN1, CR1, ABCA7, MS4A6A, MS4A4E, CD2AP, EPHA1, and CD33.

**Abbreviations:** 4-IADL, Four instrumental activities of daily living; AD, Alzheimer disease; ADAS, Alzheimer's Disease Assessment Scale; ADAS-Cog, Alzheimer's Disease Assessment Scale—cognitive subscale; ANU-ADRI, Australian National University AD Risk Index; APOE, apolipoprotein E; AUC, Area Under the Receiver Operating Characteristic Curve; BVRT, Benton Visual Retention Test; BMI, Body Mass Index; CAIDE, Cardiovascular Risk Factors, Aging and Dementia Study; Cal, calibration; CAMCOG Cambridge Cognitive Examination; CDT, Clock Drawing Test; CERAD, Consortium to Establish a Registry for ADDSM, Diagnostic and Statistical Manual of Mental Disorders; DSST, Digit Symbol Substitution Test; Ex val, external validation; FCSRT-FR, Free recall score from the Free and Cued Selective Reminding Test; FCSRT-TR, Total recall score from the Free and Cued Selective Reminding Test; FTD, Frontotemporal Dementia; GDS, Geriatric Depression Scale; HEL, High Education Level; HI, Head Injury; IAD, Instrumental Activities of Daily Living Scale; ICD-9, International Classification of Diseases, Ninth Revision; IST, Isaacs Set Test; IDSR, Intra-categorical Delayed Selective Reminding test; LEL, Low educational Level, LOAD, Late-onset AD; LM-IR, Logical Memory I immediate recall; MCI, Mild Cognitive Impairment; MMSE, Mini Mental State Examination; NINCDS-ADRD, Alzheimer's Criteria National Institute of Neurological and Communicative Disorders and Stroke and the Alzheimer's Disease and Related Disorders Association; NINCDS-AIREN, Vascular Dementia Criteria National Institute of Neurological Disorders and Stroke and Association Internationale pour la Recherche et l'Enseignement en Neurosciences; NOS, not otherwise specified; RAVLT, Rey Auditory-Verbal Learning Test; SMI, Subjective Memory Impairment; Sn, Sensitivity; Sp, Specificity; VaD, Vascular Dementia; VADAS, Vascular Dementia Assessment Scale; WAIS-R, The Wechsler Adult Intelligence Scale-Revised; WMS, Wechsler Memory Scale.

doi:10.1371/journal.pone.0136181.t002

**Table 3. Component Variables Used (Either Alone or in Combination) in the Different Risk Prediction Models (Previous and Current Review).**

|                                                   |                                                                                                                                                              |                                                                                                                                                                                                                            |
|---------------------------------------------------|--------------------------------------------------------------------------------------------------------------------------------------------------------------|----------------------------------------------------------------------------------------------------------------------------------------------------------------------------------------------------------------------------|
| <b>Demographics</b>                               | Age                                                                                                                                                          | Age                                                                                                                                                                                                                        |
|                                                   | Education                                                                                                                                                    | Education                                                                                                                                                                                                                  |
|                                                   | Sex                                                                                                                                                          | Sex                                                                                                                                                                                                                        |
|                                                   |                                                                                                                                                              | Race/Ethnicity                                                                                                                                                                                                             |
| <b>Subjective Cognitive Complaints/Impairment</b> | Difficulty remembering recent events &/or difficulty remembering short list of items (Informant reported)                                                    | Self-reported difficulty with short-term memory (“Do you frequently have difficulties in retaining or remembering new simple information?”)                                                                                |
|                                                   | Self-reported trouble “keeping mind on things” >3 days/week                                                                                                  | Self-reported “trouble keeping mind on things” >3 days/week                                                                                                                                                                |
|                                                   | Subjective memory complaint                                                                                                                                  | Subjective memory impairment (“Do you feel like your memory is becoming worse?”—with and without worry)                                                                                                                    |
| <b>Functioning</b>                                | Time to put on and button a shirt                                                                                                                            | IADL scale                                                                                                                                                                                                                 |
|                                                   |                                                                                                                                                              | IADL score (Four items: using the telephone, managing treatment, handling finances, and using transportation)                                                                                                              |
|                                                   |                                                                                                                                                              | IADL item “Does your patient need help from others to manage money or medications?”                                                                                                                                        |
| <b>Neuropsychological Tests</b>                   | Activity Recall (recall of all tests worked on during the interview)                                                                                         | ADAS-Cog Battery (Word Recall, Command, Construction, Naming, Ideation Praxis, Orientation, Word Recognition, Remembering Instructions, Spoken Difficulties, Word Finding, Comprehension, Concentration)                   |
|                                                   | ADAS-Cog (word not recalled)                                                                                                                                 | Benton Visual Retention Test (Form F MQ)                                                                                                                                                                                   |
|                                                   | Block Design (Wechsler Adult Intelligence Scale-Revised)                                                                                                     | CAMCOG (Total score, Memory (Remote, Recent, Learning, composite score), Non-memory (Orientation, Language Comprehension, Language Expression, Attention & Calculation, Praxis, Abstraction, Perception, composite score)) |
|                                                   | Boston Naming Test (subtests)                                                                                                                                | CERAD Battery (Total score, Constructional Praxis Recall, Word List Learning, Word List Recall, Boston Naming Test)                                                                                                        |
|                                                   | Buschke Selective Reminding Test                                                                                                                             | Clock Drawing Test                                                                                                                                                                                                         |
|                                                   | CAMCOG (Total score, Memory, General Knowledge, Attention & Calculation)                                                                                     | Copying (intersecting pentagons)                                                                                                                                                                                           |
|                                                   | CASI (Total score, Semantic Memory, Episodic Memory, Attention, Concentration/Mental Manipulation, Orientation, Visual Construction, Abstraction & Judgment) | Delayed Recall (3 words)                                                                                                                                                                                                   |
|                                                   | Clock drawing                                                                                                                                                | Digit Symbol Substitution Test                                                                                                                                                                                             |
|                                                   | Clock setting                                                                                                                                                | Free and Cued Selective Reminding Test (Free recall score, Total recall Score)                                                                                                                                             |
|                                                   | Clock reading                                                                                                                                                | Instruction (Paper folding)                                                                                                                                                                                                |
|                                                   | Copying (cube, coils and interlocking infinity loops)                                                                                                        | Isaacs Set Test                                                                                                                                                                                                            |
|                                                   | Digit Letter Test                                                                                                                                            | Logical Memory I (Immediate Recall)                                                                                                                                                                                        |
|                                                   | Digit Symbol Substitution Test                                                                                                                               | MMSE (Total score, Episodic Memory Subtest)                                                                                                                                                                                |
|                                                   | Free and cued recall of recognisable words                                                                                                                   | Rey-Auditory Verbal Learning Test (Short delayed recall score)                                                                                                                                                             |
|                                                   | Free and Cued Selective Reminding Test                                                                                                                       | Stroop Test                                                                                                                                                                                                                |
|                                                   | Free recall of rapidly and slowly presented random words                                                                                                     | Trail Making Test (Part A and B)                                                                                                                                                                                           |
|                                                   | Fuld Object Memory Evaluation (FOME) Recall Test                                                                                                             | Vascular Dementia Assessment Scale Cognitive Battery (Delayed recall of the ADAS-Cog 10 Word Lists, Symbol Digit Test, Digit Span Backwards, A Maze Task, Digit Cancellation Task, Animal Naming)                          |
|                                                   | Identical Pictures                                                                                                                                           | Verbal Fluency (Animals)                                                                                                                                                                                                   |
|                                                   | Intra-categorical Delayed Selective Reminding Test (IDSR-7)                                                                                                  | Wechsler Memory Scale Information Subtest                                                                                                                                                                                  |
|                                                   | List-generating fluency                                                                                                                                      |                                                                                                                                                                                                                            |

(Continued)

Table 3. (Continued)

|                                                                                                                                                                                                                                                                                        |                                                                                                                                                                                                                                                          |
|----------------------------------------------------------------------------------------------------------------------------------------------------------------------------------------------------------------------------------------------------------------------------------------|----------------------------------------------------------------------------------------------------------------------------------------------------------------------------------------------------------------------------------------------------------|
| Memory for Text                                                                                                                                                                                                                                                                        |                                                                                                                                                                                                                                                          |
| Memory Scale Information Subtest (WAIS)                                                                                                                                                                                                                                                |                                                                                                                                                                                                                                                          |
| Mini Mental State Examination (MMSE)                                                                                                                                                                                                                                                   |                                                                                                                                                                                                                                                          |
| Modified MMSE (3MS: total score and individual items)                                                                                                                                                                                                                                  |                                                                                                                                                                                                                                                          |
| Paired-Associate Learning Test                                                                                                                                                                                                                                                         |                                                                                                                                                                                                                                                          |
| Rey-Auditory Verbal Learning Test (Short delayed recall score)                                                                                                                                                                                                                         |                                                                                                                                                                                                                                                          |
| Reid Memory Test                                                                                                                                                                                                                                                                       |                                                                                                                                                                                                                                                          |
| Rey Figure (Delay recall)                                                                                                                                                                                                                                                              |                                                                                                                                                                                                                                                          |
| Screening Instrument for Cognitive Impairment & Dementia                                                                                                                                                                                                                               |                                                                                                                                                                                                                                                          |
| Similarities (Subtests)                                                                                                                                                                                                                                                                |                                                                                                                                                                                                                                                          |
| Trail Making Test (Part B)                                                                                                                                                                                                                                                             |                                                                                                                                                                                                                                                          |
| Verbal Fluency (animals, fruits, flowers vegetables, groceries, letters: 'ta', F, A and S)                                                                                                                                                                                             |                                                                                                                                                                                                                                                          |
| Vocabulary subtest of WAIS                                                                                                                                                                                                                                                             |                                                                                                                                                                                                                                                          |
| <b>Health (Objective and Self Reported)</b>                                                                                                                                                                                                                                            |                                                                                                                                                                                                                                                          |
| Angina                                                                                                                                                                                                                                                                                 | Acute metabolic events (severe hyperglycaemic or hypoglycaemic events)                                                                                                                                                                                   |
| Aortic calcification                                                                                                                                                                                                                                                                   | Anti-hypertensive agents                                                                                                                                                                                                                                 |
| Arthritis                                                                                                                                                                                                                                                                              | Arthritis or rheumatism                                                                                                                                                                                                                                  |
| Atrial fibrillation                                                                                                                                                                                                                                                                    | Body Mass Index                                                                                                                                                                                                                                          |
| Body Mass Index                                                                                                                                                                                                                                                                        | Carotid endarterectomy                                                                                                                                                                                                                                   |
| Calf pain when walks, ceases when halts                                                                                                                                                                                                                                                | Central obesity                                                                                                                                                                                                                                          |
| Chest pain when excited                                                                                                                                                                                                                                                                | Cerebrovascular attacks                                                                                                                                                                                                                                  |
| Chest pain when walking up hill or fast                                                                                                                                                                                                                                                | Chest problems                                                                                                                                                                                                                                           |
| Chronic heart failure                                                                                                                                                                                                                                                                  | Cholesterol                                                                                                                                                                                                                                              |
| Chronic obstructive pulmonary disease                                                                                                                                                                                                                                                  | Congestive heart failure                                                                                                                                                                                                                                 |
| Claudication                                                                                                                                                                                                                                                                           | Coronary artery bypass surgery/graft                                                                                                                                                                                                                     |
| Coronary artery bypass surgery                                                                                                                                                                                                                                                         | Cough                                                                                                                                                                                                                                                    |
| Defective ventricular conduction                                                                                                                                                                                                                                                       | Dental problems                                                                                                                                                                                                                                          |
| Depression                                                                                                                                                                                                                                                                             | Denture fit                                                                                                                                                                                                                                              |
| Diabetes                                                                                                                                                                                                                                                                               | Depressed mood                                                                                                                                                                                                                                           |
| Dizziness when suddenly stands up                                                                                                                                                                                                                                                      | Depression                                                                                                                                                                                                                                               |
| Extrapyramidal score (including measures of tone (rigidity, cogwheeling, nuchal rigidity), bradykinesia (slowed fine finger movements, reduced arm swing, and an overall clinical assessment of the presence of bradykinesia), resting tremor, postural flexion, and the glabella tap) | Depressive symptoms (including CES-D and DSM-III-TR Classification A1: depressed mood, A2: loss of interest, A3: change of appetite, A4: sleep disturbance, A5: psychomotor change, A6: loss of energy, A7: worthlessness, A8: concentration difficulty) |
| Heart disease                                                                                                                                                                                                                                                                          | Diabetes                                                                                                                                                                                                                                                 |
| Hypercholesterolaemia (self-reported)                                                                                                                                                                                                                                                  | Diabetic foot                                                                                                                                                                                                                                            |
| Hypertension (including hypertension currently treated)                                                                                                                                                                                                                                | Ear trouble                                                                                                                                                                                                                                              |
| Internal carotid artery thickness                                                                                                                                                                                                                                                      | Eye trouble                                                                                                                                                                                                                                              |
| Myocardial infarction                                                                                                                                                                                                                                                                  | Eyesight trouble                                                                                                                                                                                                                                         |
| Parkinson disease                                                                                                                                                                                                                                                                      | Feet or ankle trouble                                                                                                                                                                                                                                    |
| Peripheral artery disease                                                                                                                                                                                                                                                              | Fractures (any)                                                                                                                                                                                                                                          |
| Pulmonary congestion                                                                                                                                                                                                                                                                   | Glycosylated haemoglobin (HbA1c)                                                                                                                                                                                                                         |
| Second heart sound abnormal                                                                                                                                                                                                                                                            | Head trauma                                                                                                                                                                                                                                              |
| Sinus tachycardia                                                                                                                                                                                                                                                                      | Hearing trouble                                                                                                                                                                                                                                          |
| Stroke                                                                                                                                                                                                                                                                                 | High density lipoprotein cholesterol level                                                                                                                                                                                                               |
| Systolic blood pressure                                                                                                                                                                                                                                                                | Hypertension                                                                                                                                                                                                                                             |
| Transient ischaemic attack                                                                                                                                                                                                                                                             | Incontinence (urinary: lose control of bladder and faecal: lose control of bowels)                                                                                                                                                                       |

(Continued)

Table 3. (Continued)

|                               |                                               |                                                                                    |
|-------------------------------|-----------------------------------------------|------------------------------------------------------------------------------------|
|                               | T-wave abnormalities                          | Kidney trouble                                                                     |
|                               | Total cholesterol level                       | Microvascular disease (diabetic retinal or end-stagerenal)                         |
|                               |                                               | Myocardial infarction                                                              |
|                               |                                               | Nose stuffed up or sneezing                                                        |
|                               |                                               | Percutaneous transluminal coronary angioplasty                                     |
|                               |                                               | Peripheral artery disease                                                          |
|                               |                                               | Poor lung function                                                                 |
|                               |                                               | Skin problems                                                                      |
|                               |                                               | Stomach trouble                                                                    |
|                               |                                               | Stroke                                                                             |
|                               |                                               | Systolic blood pressure                                                            |
|                               |                                               | Total cholesterol level                                                            |
|                               |                                               | Traumatic brain injury                                                             |
|                               |                                               | Waist-Hip-Ratio                                                                    |
| <b>Lifestyle</b>              | Alcohol                                       | Alcohol                                                                            |
|                               | Physical activity                             | Physical activity/Exercise                                                         |
|                               | Smoking                                       | Smoking                                                                            |
| <b>Diet</b>                   |                                               | Folic acid                                                                         |
|                               |                                               | Fish intake                                                                        |
| <b>Genetics</b>               | APOE                                          | ABCA7                                                                              |
|                               |                                               | APOE                                                                               |
|                               |                                               | BIN1                                                                               |
|                               |                                               | CD2AP                                                                              |
|                               |                                               | CD33                                                                               |
|                               |                                               | CLU                                                                                |
|                               |                                               | CR1                                                                                |
|                               |                                               | EPHA1                                                                              |
|                               |                                               | MS4A6A                                                                             |
|                               |                                               | MS4A4E                                                                             |
|                               |                                               | PICALM                                                                             |
| <b>MRI</b>                    | Enlarged ventricles                           |                                                                                    |
|                               | White matter disease                          |                                                                                    |
| <b>Statistics/Methodology</b> | Reliable change indices                       |                                                                                    |
|                               | Within persons across test variability        |                                                                                    |
| <b>Other</b>                  | Family history of dementia (Informant report) | Cognitive activity                                                                 |
|                               | Walking speed (5 meter returned walk)         | Clinical Dementia Rating Scale—Sum of Boxes (Clinician & algorithm based)          |
|                               |                                               | International Working Group Consensus Criteria for Mild Cognitive Impairment (MCI) |
|                               |                                               | Self-reported Health (how good & report of any health problems)                    |
|                               |                                               | Social network and engagement                                                      |

**Abbreviations:** **ADAS-Cog** Alzheimer's Disease Assessment Scale-cognitive; **IADL** Instrumental Activities of Daily Living; **CAMCOG** Cambridge Cognitive Examination; **CASI** The Cognitive Abilities Screening Instrument; **CERAD** Consortium to Establish a Registry for Alzheimer's Disease; **CES-D** Center for Epidemiologic Studies **Depression Scale**; **DSM-III-R** Diagnostic & Statistical Manual of Mental Disorders—3rd Edition Revised; **IDSR-7** Intra-categorical Delayed Selective Reminding Test; **MMSE** Mini Mental State Examination; **WAIS** Wechsler Adult Intelligence Scale

doi:10.1371/journal.pone.0136181.t003

**Table 4. Optimum features of study design and variables selected for dementia risk prediction models.**

|                                                                                                                                                                               |
|-------------------------------------------------------------------------------------------------------------------------------------------------------------------------------|
| <b>Data &amp; Data Analysis</b>                                                                                                                                               |
| Minimal attrition or use of methodology that accounts for attrition (e.g., loss of follow-up and death)                                                                       |
| Considerations of the description of population, diagnostic method and follow-up time                                                                                         |
| Examine internal validity (i.e., equivalent performance in different subgroups)                                                                                               |
| External validation                                                                                                                                                           |
| High AUC/c-statistic (closer to 1 the better)                                                                                                                                 |
| Consideration of whether to prioritise sensitivity or specificity and the implications of doing so                                                                            |
| <b>Data Presentation</b>                                                                                                                                                      |
| Sensitivity and specificity given at multiple cut-off points                                                                                                                  |
| Confidence Intervals of each statistic and if comparisons are made, use of a formal method of statistical inference                                                           |
| <b>Risk Factor Timing</b>                                                                                                                                                     |
| Special attention to mid-life risk factor ascertainment in older subjects (e.g., risk factors for dementia in mid-life may not be associated with dementia in older subjects) |
| <b>Patient Acceptability</b>                                                                                                                                                  |
| Risk variable attainment (e.g., cost and ease of acquisition of the data from a patient as well as health care provider point of view)                                        |
| Risk score calculation (acceptability to the patient/health care provider)                                                                                                    |
| <b>Ease of Access to Variables</b>                                                                                                                                            |
| Cost                                                                                                                                                                          |
| Invasiveness                                                                                                                                                                  |

doi:10.1371/journal.pone.0136181.t004

review and illustrates that there is large variability in model components and differences across the two reviews.

Differences are mainly in the addition of novel (non-traditional) dementia risk variables[25], information on diet[4], depression symptomology[4, 13, 24], ethnicity[14, 20, 23], and extension of genetic analysis to include non-APOE genes[17]. In addition, fewer cognitive tests are used and there is a smaller pool of candidate risk factors, likely due to more evidence being available.

## Model Diagnostics

Performance of models has been assessed using measures of discriminative accuracy (e.g., AUC/c-statistic), sensitivity, specificity, positive predictive value (PPV), negative predictive value (NPV), internal calibration, LR+/LR-, the net reclassification index (NRI) and the integrated discrimination improvement (IDI) statistic. Discriminative accuracy was measured in all studies and ranged from low 0.49[4] to moderate 0.89[9]. Cut-off points with sensitivity and specificity estimates were only reported in five studies[7, 19, 22, 23, 26]. Where available, cut-off points were determined as follows: (1) maximisation of Youden's index (Formula = Sensitivity + Specificity - 1)[22, 23, 26]; (2) computed by cross validation to correct for optimism as a result of validation on the learning data to correspond to a sensitivity value[7]; or, (3) defining the cut-off scores as those values with high specificity and increased PPV[19]. No model reported a cut-off score with both sensitivity and specificity over 80%. Three studies reported PPVs: (1) 9 to 41% (range across different length of follow-up interval and educational level)[7]; (2) 6.6 to 49.9% (range across different cut-off scores)[23]; and, (3) 14.7% with a cut-off that provided sensitivity of at least 80%[19]. Two studies reported NPVs: range across different cut-off scores: 86.0 to 99.0%[7] and 97.7%[19]. NPV should be higher than the proportion of subjects who did not have the outcome of dementia (i.e., the "stable" subjects), if the prediction is better than chance.

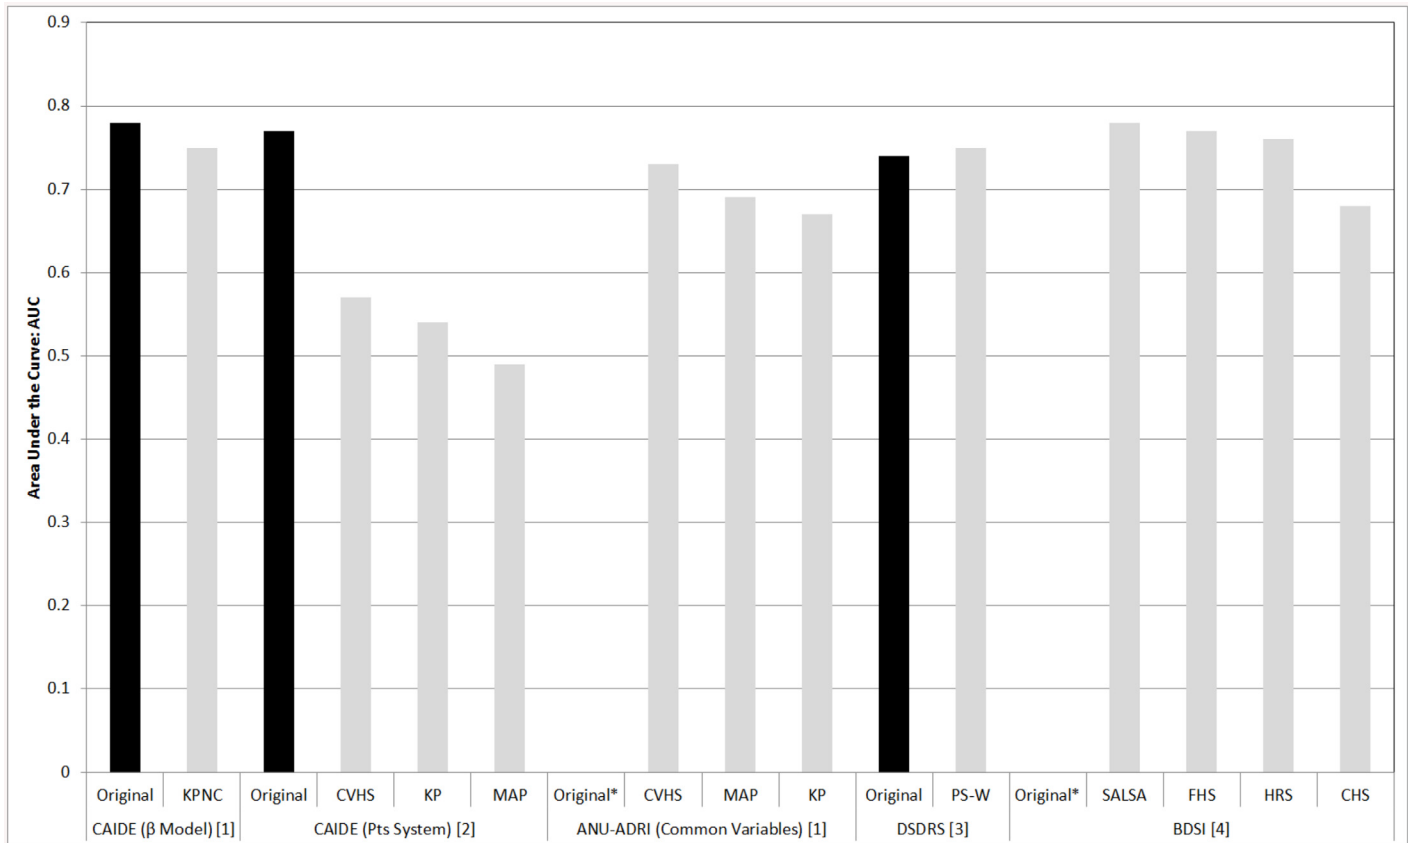

**Fig 2. Comparison of AUC indices in development vs. validation cohorts across different dementia risk prediction models.** Key: BDSI, Brief Dementia Screening Index; CAIDE, Cardiovascular Risk Factors, Aging and Dementia; CHS, Cardiovascular Health Study; CVHS, Cardiovascular Health Cognition Study; DSDRS, Type-2 Diabetes Specific Dementia Risk Score; FHS, Framingham Heart Study; KP, Kungsholmen Project; KPNC, Kaiser Permanente Medical Care Program of Northern California; MAP, Rush Memory and Aging Project; PS-W, Pathways study cohort from Washington; Pts, Points; SALSA Sacramento Area Latino Study on Aging. **References** [1] Anstey KJ, Cherbuin N, Herath PM, Qiu C, Kuller LH, Lopez OL, et al. A Self-Report Risk Index to Predict Occurrence of Dementia in Three Independent Cohorts of Older Adults: The ANU-ADRI. *PLoS One*. 2014;9(1):e86141; [2] Exalto LG QC, Barnes D, Kivipelto M, Biessels GJ, Whitmer RA. Midlife risk score for the prediction of dementia four decades later. *Alzheimers Dementia*. 2013; [3] Exalto LG, Biessels GJ, Karter AJ, Huang ES, Katon WJ, Minkoff JR, et al. Risk score for prediction of 10 year dementia risk in individuals with type 2 diabetes: a cohort study. *The Lancet Diabetes and Endocrinology*. 2013; [4] Barnes DE, Beiser AS, Lee A, Langa KM, Koyama A, Preis SR, et al. Development and validation of a brief dementia screening indicator for primary care. *Alzheimers Dementia*. 2014;S1552-5260. **Notes** \* No development dataset. Rather, model tested in different cohorts.

doi:10.1371/journal.pone.0136181.g002

Since the proportion of subjects not becoming demented was generally >85% (and always >70%)—as inferred from Table 2—a high NPV is expected, because the number depends on the prevalence of the disease in the sample. The same logic can be applied to PPV. It should be noted that because the proportion of subjects becoming demented (or not) varies among the populations, variations in PPV and NPV do not necessarily reflect differences in performance of the models. Only one study[26] reported LR+/LR- and found that a neuropsychological prediction model provided a clinically important change in pre- to post-test probability of converting to dementia (all cause) over 5 and 10 years follow-up.

Model calibration was rarely reported, and where reported indicated good fit[13, 14, 20]. Reclassification indices including NRI and the IDI statistics that test the addition of variables to risk models, were used in two studies[14, 15]. The first study evaluated the influence of the APOE genotype on the accuracy of AD risk assessment using NRI and found a significant improvement (NRI 0.18,  $Z_{NRI} = 2.47$ ,  $P = 0.01$ ) compared to a non-APOE model; the IDI was



estimated as 6.25 ( $Z_{IDI} = 3.75$ ,  $P < 0.001$ ) [15]. The second used NRI and IDI to assess the improvements in performance of the Cardiovascular Risk Factors, Aging and Dementia (CAIDE) risk score by adding new risk factors [14]. Here, both the NRI and IDI showed no model improvements with the additional variables.

## Models for Specific Subgroups of Individuals

One study developed a risk score, the Type-2 Diabetes Specific Dementia Risk Score (DSDRS), for predicting 10-year incident dementia, in a primary care setting, in a large cohort of individuals ( $N = 29,961$ ) with type II diabetes [13]. The model incorporated age, education, microvascular disease, diabetic foot, cerebrovascular disease, cardiovascular disease, acute metabolic event and depression and was well calibrated and externally validated with moderate levels of predictive accuracy (AUC = 0.74 development cohort vs. AUC = 0.75 validation cohort). In another study, model development was undertaken in a sample stratified by education level (low: no elementary school diploma vs. high: secondary school or university) and follow-up time (3 vs. 10 years) [7]. This resulted in four different models that varied by education and length of follow-up as shown in Table 2.

## Model Validation

Only four studies have undertaken validation [4, 13, 14, 20]. Differences between the AUCs in the development and validation cohorts for the different models tested are shown in Fig 2.

**CAIDE.** The CAIDE model was developed in sample of participants from Finland ( $N = 1,409$ , age range: 39 to 64 years) and uses risk factors in midlife to estimate an individuals' risk of later life dementia (mean follow-up time = 20 years). The model incorporates age, education, sex, cholesterol level, BMI and systolic blood pressure (with and without APOE e4 status) [30]. Using data from the Kaiser Permanente ( $n = 9,480$ ; age range: 40 to 55 years; mean follow up-time = 36.1 years) a similar AUC to the original study was reported (0.75 validation vs. 0.78 original cohort) [14]. Furthermore, when the Kaiser Permanente sample was stratified by ethnicity the CAIDE model was found to predict dementia well across different ethnicities including Asian (AUC = 0.81), Black (AUC = 0.75) and White (AUC = 0.74). These estimates are comparable to those reported in the original publication (model development dataset AUC = 0.78) [30]. This study also attempted to improve the discriminative accuracy of the CAIDE score with the addition of new variables such as central obesity, depressed mood, diabetes, head trauma, poor lung function and smoking but no significant improvement was shown [14].

When using the CAIDE risk score for predicting dementia in three older aged cohorts, the Rush Memory and Aging Project, the Kungsholmen Project and the Cardiovascular Health and Cognition Study, validation was found to be poor (AUC range all-cause dementia: 0.49 to 0.57; AUC range AD: 0.49 to 0.57) [4]. Interestingly, excluding BMI or BMI and cholesterol level together, modestly increased discriminative accuracy for all-cause dementia (AUC range: 0.55 to 0.60) and AD (AUC range 0.55 to 0.58) [4]. This result suggests that these variables may not be as important for predicting dementia in later vs. midlife. Indeed, in some studies of older aged cohorts higher BMI, cholesterol levels and blood pressure are found to be protective against dementia [31]. Therefore, poor transportability of the CAIDE model to these three cohorts may be due to the fact that the development dataset was a midlife cohort and the validation datasets were from older aged cohorts (Mean at baseline range: 72.3 to 81.5 years). The results could also be due to attrition rates as only 3% were lost to follow-up in the original study [30] compared to more than 20% of participants being lost in the three validation cohorts [4].

**ANU-ADRI.** Using an evidence synthesis approach to model development, the ANU-ADRI model was developed to assess a person's risk for later life AD (i.e., over 60 years of age) based on exposure to 11 risk and four protective factors including: age, education, sex, BMI, diabetes, depression, cholesterol, traumatic brain injury, smoking, alcohol use, physical activity, pesticide exposure, social engagement, cognitive activity, and fish intake. Validation of the ANU-ADRI[4] score produced moderate levels of discrimination for dementia when between eight to 10 of the different risk/protective variables were mapped across three studies (AUC range: 0.64 to 0.74). The studies included the Rush Memory and Aging Study (N = 903), the Kungsholmen Project (N = 905) and the Cardiovascular Health Cognition Study (N = 2,496). The variables mapped included: demographic (age, gender, education), health (diabetes, traumatic brain injury, depressive symptoms), cognition (cognitive activity) and lifestyle factors (social network and engagement, smoking, alcohol, physical activity). When only common variables from all cohorts were used (n = 6 variables including: age, sex, education, diabetes, smoking, alcohol) the AUCs were: 0.69 (95% CI 0.65 to 0.73), 0.68 (0.63 to 0.70) and 0.73 (0.71 to 0.76) in the Rush Memory and Aging Study, the Kungsholmen Project and the Cardiovascular Health Cognition Study, respectively. The authors did not test whether the differences in AUCs when common variables were mapped across the different cohorts were statistically significant. These results are interesting and raise the question as to whether all or just some risk factors are needed to accurately predict future disease. It should be noted that one explanation for differences in AUC estimates could be variation in age. In particular the Kungsholmen Project, which included participants born before 1912 (baseline age > 75), was older than the other two samples (Rush Memory and Aging Study baseline age > 53, Cardiovascular Health Cognition Study > 65). The study also investigated the effect of gender on discriminative accuracy of the ANU-ADRI within each cohort and found only slight differences: the reported 95% CIs for males and females overlapped suggesting that any differences in discriminative accuracy were not significant.

**BDSI.** The BDSI was developed with a three-step approach in four cohort studies including: the Cardiovascular Health Study, Framingham Heart Study, Health and Retirement Study, and the Sacramento Area Latino Study on Aging[20]. First, a list of potential predictive factors available in most or all cohorts was identified. Second, in each cohort, variables most predictive of dementia at six years were identified independently. Third, a subset of variables that were consistently found in all four cohorts was identified and used in the model including demographics (age, education), health (history of stroke, diabetes mellitus, BMI, depressive symptoms) and lifestyle (assistance needed with money or medications) factors. The c-statistic for predicting 6-year incident dementia varied between the 4 cohorts from 0.68 to 0.78. Sensitivity analyses, using data from the Health and Retirement Study and Cardiovascular Health Study, suggested that discrimination was good across different race/ethnic groups: Health and Retirement Study (c-statistic = 0.75 Whites, 0.70 Blacks, 0.71 Latinos) and the Cardiovascular Health Study (c-statistic = 0.70 Whites, 0.65 Blacks)[20].

## Cost Considerations

One study considered the impact on discriminative accuracy of modifying the calculation of a resource intensive risk score to incorporate less expensive measures. The original resource intensive model, the Late Life Dementia Risk Index, included demographic (age), lifestyle (alcohol consumption), neuropsychological (Modified Mini Mental State Examination (MMSE) score and Digit Symbol Substitution Score), medical (history of coronary bypass surgery and BMI), physical functioning (time to put on and button a shirt in seconds), genetic (APOE), cerebral magnetic resonance imaging (MRI) (white matter disease and enlarged

ventricles), and carotid artery ultrasound (internal carotid artery thickness  $>2.2\text{mm}$ ) measures, and had good discrimination for the prediction of 6-year incident dementia ( $c$ -statistic = 0.81, 95%CI: 0.79 to 0.83)[32]. The revised model, the Brief Dementia Risk Index, incorporated age, neuropsychological testing (3 word delayed recall, interlocking pentagon copying, verbal instructions (paper taking and folding), four legged animal naming task (30 seconds)), self-reported attention difficulties (3 or more days per week in the last month), medical history (stroke, peripheral artery disease, or coronary artery bypass surgery and BMI) and alcohol consumption and had a significantly lower discriminative accuracy ( $c$ -statistic = 0.77,  $p < 0.001$ ), but was able to categorize subjects as having low, moderate, or high risk of dementia with similar accuracy compared to the more resource intensive score[21].

## Discussion

The results from the review show that many new models for dementia risk prediction have been developed over the last five years. There have also been significant changes to the types of variables used when compared to the previous review. However few studies have addressed the issues of external validation and cost in using the risk model.

## Strengths and Limitations

The strengths of this review are its systematic approach and inclusivity. There are some limitations. It is difficult to synthesise the literature on dementia risk prediction due to the large variability across studies in follow-up length (range: 1.5 years[9] to 17 years[15]), sample age (range: 40 to 99 years), outcomes tested (e.g., AD vs. all-cause dementia vs. dementia subtypes, quality of the diagnosis), source of population (volunteer vs. population representative) and the different variables incorporated into the prediction models. As such a meta-analysis was not possible. Furthermore, any meaningful conclusions for population screening are limited by the lack of cost-effective analysis and limited assessment of model transportability.

## Clinical Implications

There is currently a clinical drive towards timelier diagnosis particularly in developed countries such as the UK with the introduction of primary care direct enhanced services looking to identify those at risk of developing dementia e.g. stroke, diabetes, cardiovascular disease[33]. A risk prediction tool, particularly in at risk populations such as diabetes[13] could further enhance existing services. However, if model development in the field of dementia continues at its current pace and if dementia risk prediction is found to be useful and cost-effective, then researchers and possibly clinicians will face difficult choices regarding which model to apply, particularly as study comparison is difficult.

### **Variables in the Prediction Models and Comparison to Results from the First Review.**

Compared to the earlier review [1] elements common to the majority of risk scores include age, education, measures of cognition and health. However, new developments in dementia risk prediction include non-APOE genes and genetic risk scores[17, 18], testing of non-traditional dementia risk factors[25], incorporation of information on diet[4], physical function[4], physical activity/exercise and ethnicity[16] into risk modelling, and model development in specific subgroups of the population (e.g., individuals with diabetes[13] and those with low vs. high educational attainment[7]) and over different follow-up times. Furthermore, fewer cognitive tests have been used in prediction models, reflecting our increasing knowledge of risk and protective factors. Despite the dramatic increase in the number of models and novel risk scores, discriminative accuracy has not changed to a significant degree when compared to the previous review (range in the 2010 review: 0.49 to 0.91 vs. range in this review: 0.49 to 0.89). Aside from

cognitive based models, generally, the best models are those that incorporate multiple risk factors across different variable categories (e.g., demographic, cognition, physical and health). Within the limits of our relatively limited knowledge of the genetic factors that influence dementia risk, where statistically tested, addition of novel (non-APOE) risk factors to prediction models do not appear to significantly increase discriminative accuracy[17]. In contrast, the APOE genotype, at least in some studies, appears to be informative. Future work into polygenic risk scores would help.

Further there has been a drive towards more accessible and potentially modifiable variables. Modifiable variables are important as they have the potential to be specifically targeted in primary or secondary prevention. There is now also evidence that around a third of AD cases worldwide may be due to modifiable risk factors [34]. With risk models likely to be used in the primary care setting, the availability of imaging variables may be difficult to obtain nor do they significantly improve discrimination in prediction of dementia beyond the more readily published multifactorial models [35].

## Stratified Analyses

Results from stratified analysis suggest that unique dementia risk prediction models may need to be developed depending on follow-up length (e.g., BMI and hypertension may be more important in mid-life compared to later life models)[7, 23, 26, 36–38], an individual's education level (found in one study and requires replication) [7], health status (e.g., diabetes)[13], APOE status[23] and the outcome tested (e.g., most studies focus on all-cause dementia and different models maybe needed depending on dementia subtype)[19]. Further research is required to develop risk models in samples stratified by other confounding factors known to influence the timing and presentation of dementia symptoms (such as mid vs. later life) as well as investigate the interactions between different risk variables (e.g., such as APOE status and age).

## Model Transportability

Before a risk prediction tool can be used in clinical practice or for research, transportability of the model outside the cohort from which it was developed needs to be assessed. Only four studies have externally validated dementia risk prediction models and the results were mixed[4, 13, 14, 20]. The DSDRS model was developed and validated with moderate but similar levels of discrimination (AUC 0.74 development vs. 0.75 validation)[13]. This is in comparison to the CAIDE score (originally developed for midlife), which was poorly validated in three separate (older) cohorts (AUC 0.77 development vs. AUC range 0.49–0.57 validation)[4]. However, it is important to note that in this validation of the CAIDE score rather different populations were used, that varied by age (mid vs. later life). Indeed, factors like higher BMI, blood pressure and cholesterol levels are associated with lower incidence of dementia in the oldest old [31]. In contrast, the CAIDE score was found to transport well when the test population better resembled the original population (i.e., was a mid-life cohort)[14]. Generally, external validation is difficult largely due to the lack of available cohorts with which to test models in terms of follow-up times, data collected, age groups and risk variable measurement.

Most studies have been developed in datasets from North America (N = 12 studies), with others developed in the UK (N = 1), Japan (N = 1), Austria (N = 1), the Netherlands (N = 2), Pan-Europe (N = 1), Germany (N = 3) and France (N = 1). Whether the different models are applicable across countries that vary by health and wealth is not known. Further, no models have been developed for predicting other dementia sub-types, such as vascular dementia or dementia with Lewy Bodies or for predicting different disease severity (e.g., mild, moderate and severe dementia). This may have implications for treatment options.

## Issues Around Cost

The ability to assess the relative cost of calculating the different risk models and compare this against the model's accuracy will significantly influence recommendations about possible protocols for screening for dementia risk. Further, the incorporation of readily accessible primary care related factors would be most useful for application within clinical and population based settings. Three studies [4, 20, 21] have considered time and/or financial implications in risk score calculation. However, in one study it was found that reducing the cost of risk score computation by removing the need for MRI, ECG and detailed neuropsychological measures and replacing them with less resource intensive variables (e.g., more detailed self-reported health history and simple cognitive test items) resulted in a significant decline in discriminative accuracy [21, 32]. Thus raising the issue of what is the best information and minimum data set needed for accurate dementia risk prediction. It is important to note that current models have not yet utilized cerebrospinal fluid or positron emission tomography data as recommended for classifying AD and its preclinical stages in new (clinical and research) criteria for AD and its preclinical/prodromal states [39, 40]. Although these factors can be used to assist dementia diagnosis, the feasibility and acceptance of incorporating them into risk prediction models and, particularly in population-based settings, would likely be low.

## Conclusions

Before a risk assessment tool can be implemented we need to know its discriminative accuracy, predictive value, cost-effectiveness, transportability (e.g., to particular populations, ages and gender etc.), and the general availability of its variables (e.g., to enable cross-study comparison and result verification). We must also consider the design implications of the model: Are we interested in highly sensitive indicators of near term (i.e., 3-years) incidence of dementia? What operating characteristics are optimal for longer-term (5–10 years) predictive models? Are we contemplating a stratified approach, whereby low-cost screening identifies subjects with higher risk for more detailed and costly assessments?

It is not possible to state with certainty whether there exists one model that can be recommended for dementia risk prediction in population-based settings. This is largely due to the lack of risk score validation studies. Consideration of the optimal features of new models should largely focus on methodology (model development and testing) and the cost and acceptability of deriving the risk factors. Further work is required to validate existing models or develop new ones, as well as to assess their cost-effectiveness and ethical implications, before applying the particular models in population-based or clinical settings. While it is difficult to make a recommendation regarding which model, we nonetheless offer some recommendations of the optimal features for new models (see [Table 4](#)).

## Supporting Information

**S1 PRISMA Checklist. PRISMA 2009 Checklist.**

(DOC)

## Author Contributions

Conceived and designed the experiments: EYHT BCMS. Performed the experiments: EYHT SLH LE BCMS. Analyzed the data: EYHT SLH BCMS. Wrote the paper: EYHT SLH MFG PJV GN CD CB LR LJL BCMS.



## References

- Stephan BCM, Kurth T, Matthews FE, Brayne C, Dufouil C. Dementia risk prediction in the population: are screening models accurate? *Nat Rev Neurol*. 2010; 6(6):318–26. doi: [10.1038/nrneurol.2010.54](https://doi.org/10.1038/nrneurol.2010.54) PMID: [20498679](https://pubmed.ncbi.nlm.nih.gov/20498679/)
- Liberati A, Altman DG, Tetzlaff J, Mulrow C, Gotzsche PC, Ioannidis JP, et al. The PRISMA statement for reporting systematic reviews and meta-analyses of studies that evaluate health care interventions: explanation and elaboration. *Journal of clinical epidemiology*. 2009; 62(10):e1–34. doi: [10.1016/j.jclinepi.2009.06.006](https://doi.org/10.1016/j.jclinepi.2009.06.006) PMID: [19631507](https://pubmed.ncbi.nlm.nih.gov/19631507/).
- Anstey KJ, Cherbuin N, Herath PM. Development of a new method for assessing global risk of Alzheimer's disease for use in population health approaches to prevention. *Prevention science: the official journal of the Society for Prevention Research*. 2013; 14(4):411–21. Epub 2013/01/16. doi: [10.1007/s11121-012-0313-2](https://doi.org/10.1007/s11121-012-0313-2) PMID: [23319292](https://pubmed.ncbi.nlm.nih.gov/23319292/); PubMed Central PMCID: PMC3696462.
- Anstey KJ, Cherbuin N, Herath PM, Qiu C, Kuller LH, Lopez OL, et al. A Self-Report Risk Index to Predict Occurrence of Dementia in Three Independent Cohorts of Older Adults: The ANU-ADRI. *PLoS One*. 2014; 9(1):e86141. doi: [10.1371/journal.pone.0086141](https://doi.org/10.1371/journal.pone.0086141) eCollection 2014. PMID: [24465922](https://pubmed.ncbi.nlm.nih.gov/24465922/)
- Wells GA, Shea B, O'Connell B, Peterson J, Welch V, Losos M, et al. The Newcastle-Ottawa scale (NOS) for assessing the quality of nonrandomised studies in meta-analysis [cited 2014 19/03/2014]. Available: [http://www.ohri.ca/programs/clinical\\_epidemiology/oxford.asp](http://www.ohri.ca/programs/clinical_epidemiology/oxford.asp).
- Higgins JPT, Green S, Cochrane Collaboration. *Cochrane handbook for systematic reviews of interventions*. Chichester: Wiley-Blackwell; 2009. xxi, 649 p. p.
- Chary EAH, Pérès K, Orgogozo JM, Dartigues JF, Jacqmin-Gadda H. Short- versus long-term prediction of dementia among subjects with low and high educational levels. *Alzheimers Dementia*. 2013; 9(5):562–71.
- Okereke OI, Pantoja-Galicia N, Copeland M, Hyman BT, Wanggaard T, Albert MS, et al. The SIST-M Predictive Validity of a Brief Structured Clinical Dementia Rating Interview. *Alzheimer Disease & Associated Disorders*. 2012; 26(3):225–31. doi: [10.1097/WAD.0b013e318231cd30](https://doi.org/10.1097/WAD.0b013e318231cd30) WOS:000308186900005.
- Wolfsgruber S, Jessen F, Wiese B, Stein J, Bickel H, Mösch E, et al. The CERAD Neuropsychological Assessment Battery Total Score Detects and Predicts Alzheimer Disease Dementia with High Diagnostic Accuracy. *American Journal of Geriatric Psychiatry*. 2013. doi: [10.1016/j.jagp.2012.08.021](https://doi.org/10.1016/j.jagp.2012.08.021)
- Madureira S, Verdelho A, Moleiro C, Ferro JM, Erkinjuntti T, Jokinen H, et al. Neuropsychological Predictors of Dementia in a Three-Year Follow-Up Period: Data from the LADIS Study. *Dementia and Geriatric Cognitive Disorders*. 2010; 29(4):325–34. doi: [10.1159/000278333](https://doi.org/10.1159/000278333) WOS:000278130700006. PMID: [20389074](https://pubmed.ncbi.nlm.nih.gov/20389074/)
- Grober E, Sanders AE, Hall C, Lipton RB. Free and cued selective reminding identifies very mild dementia in primary care. *Alzheimer Disease and Associated Disorders*. 2010; 24(3):284–90. doi: [10.1097/WAD.0b013e3181cfc78b](https://doi.org/10.1097/WAD.0b013e3181cfc78b)
- Restaino M, Matthews FE, Minett T, Albanese E, Brayne C, Stephan BCM. Predicting risk of 2-year incident dementia using the camcog total and subscale scores. *Age and Ageing*. 2013; 42(5):649–53. doi: [10.1093/ageing/agt082](https://doi.org/10.1093/ageing/agt082)
- Exalto LG, Biessels GJ, Karter AJ, Huang ES, Katon WJ, Minkoff JR, et al. Risk score for prediction of 10 year dementia risk in individuals with type 2 diabetes: a cohort study. *The Lancet Diabetes and Endocrinology*. 2013. doi: [10.1016/S2213-8587\(13\)70048-2](https://doi.org/10.1016/S2213-8587(13)70048-2)
- Exalto LG Q C, Barnes D, Kivipelto M, Biessels GJ, Whitmer RA. Midlife risk score for the prediction of dementia four decades later. *Alzheimers Dementia*. 2013. doi: [10.1016/j.jalz.2013.05.1772](https://doi.org/10.1016/j.jalz.2013.05.1772) [Epub ahead of print].
- Ohara T, N T, Kubo M, Hirakawa Y, Doi Y, Hata J, Iwaki T, Kanba S, Kiyohara Y. Apolipoprotein genotype for prediction of Alzheimer's disease in older Japanese: the Hisayama Study. *J Am Geriatr Soc*. 2011; 59(6):1074–9. doi: [10.1111/j.1532-5415.2011.03405.x](https://doi.org/10.1111/j.1532-5415.2011.03405.x) PMID: [21649613](https://pubmed.ncbi.nlm.nih.gov/21649613/)
- Reitz C T M, Schupf N, Manly JJ, Mayeux R, Luchsinger JA. A summary risk score for the prediction of Alzheimer disease in elderly persons. *Archives of Neurology*. 2010; 67(7):835–41. doi: [10.1001/archneurol.2010.136](https://doi.org/10.1001/archneurol.2010.136)
- Seshadri SFA, Ikram MA, DeStefano AL, Gudnason V, Boada M, Bis JC, et al. Genome-wide analysis of genetic loci associated with Alzheimer disease. *JAMA*. 2010; 303(18):1832–40. doi: [10.1001/jama.2010.574](https://doi.org/10.1001/jama.2010.574) PMID: [20460622](https://pubmed.ncbi.nlm.nih.gov/20460622/)
- Verhaaren BFJ, Vernooij MW, Koudstaal PJ, Uitterlinden AG, van Duijn CM, Hofman A, et al. Alzheimer's Disease Genes and Cognition in the Nondemented General Population. *Biological Psychiatry*. 2013; 73(5):429–34. doi: [10.1016/j.biopsych.2012.04.009](https://doi.org/10.1016/j.biopsych.2012.04.009) WOS:000314634900008. PMID: [22592056](https://pubmed.ncbi.nlm.nih.gov/22592056/)

19. Jessen FWB, Bickel H, Eißländer-Gorfer S, Fuchs A, Kaduszkiewicz H, Köhler M, et al. Prediction of dementia in primary care patients. *PLoS One*. 2011; 6(2):e16852. doi: [10.1371/journal.pone.0016852](https://doi.org/10.1371/journal.pone.0016852) PMID: [21364746](https://pubmed.ncbi.nlm.nih.gov/21364746/)
20. Barnes DE, Beiser AS, Lee A, Langa KM, Koyama A, Preis SR, et al. Development and validation of a brief dementia screening indicator for primary care. *Alzheimers Dementia*. 2014:S1552–5260. doi: [10.1016/j.jalz.2013.11.006](https://doi.org/10.1016/j.jalz.2013.11.006)
21. Barnes DE, C K, Whitmer RA, Juller LH, Lopez OL, Yaffe K. Dementia Risk Indices: A Framework for Identifying Individuals with a High Dementia Risk. *Alzheimers Dementia*. 2010; 6(2):138–41.
22. Ehreke L, Luppä M, König HH, Villringer A, Riedel-Heller SG. Does the clock drawing test predict dementia? Results of the Leipzig longitudinal study of the aged (LEILA 75+). *Dementia and Geriatric Cognitive Disorders*. 2011; 31(2):89–97. doi: [10.1159/000323317](https://doi.org/10.1159/000323317) PMID: [21242690](https://pubmed.ncbi.nlm.nih.gov/21242690/)
23. Derby CA, Burns LC, Wang C, Katz MJ, Zimmerman ME, L'Italien G, et al. Screening for predementia AD: Time-dependent operating characteristics of episodic memory tests. *Neurology*. 2013; 80(14):1307–14. doi: [10.1212/WNL.0b013e31828ab2c9](https://doi.org/10.1212/WNL.0b013e31828ab2c9) PMID: [23468542](https://pubmed.ncbi.nlm.nih.gov/23468542/)
24. Mossaheb N, Zehetmayer S, Jungwirth S, Weissgram S, Rainer M, Tragl KH, et al. Are specific symptoms of depression predictive of Alzheimer's dementia? *Journal of Clinical Psychiatry*. 2012; 73(7):1009–15. PMID: [22687442](https://pubmed.ncbi.nlm.nih.gov/22687442/)
25. Song X, Mitnitski A, Rockwood K. Nontraditional risk factors combine to predict Alzheimer disease and dementia. *Neurology*. 2011; 77(3):227–34. doi: [10.1212/WNL.0b013e318225c6bc](https://doi.org/10.1212/WNL.0b013e318225c6bc) PMID: [21753161](https://pubmed.ncbi.nlm.nih.gov/21753161/)
26. Tierney MCMR, McDowell I. Prediction of all-cause dementia using neuropsychological tests within 10 and 5 years of diagnosis in a community-based sample. *J Alzheimers Disease*. 2010; 22(4):1231–40.
27. Wilson PW, D'Agostino RB, Levy D, Belanger AM, Silbershatz H, Kannel WB. Prediction of coronary heart disease using risk factor categories. *Circulation*. 1998; 97(18):1837–47. PMID: [9603539](https://pubmed.ncbi.nlm.nih.gov/9603539/)
28. Siontis GC, Tzoulaki I, Siontis KC, Ioannidis JP. Comparisons of established risk prediction models for cardiovascular disease: systematic review. *BMJ*. 2012; 344:e3318. doi: [10.1136/bmj.e3318](https://doi.org/10.1136/bmj.e3318) PMID: [22628003](https://pubmed.ncbi.nlm.nih.gov/22628003/)
29. Sheikhtaheri A, Sadoughi F, Hashemi Dehaghi Z. Developing and using expert systems and neural networks in medicine: a review on benefits and challenges. *Journal of medical systems*. 2014; 38(9):110. Epub 2014/07/17. doi: [10.1007/s10916-014-0110-5](https://doi.org/10.1007/s10916-014-0110-5) PMID: [25027017](https://pubmed.ncbi.nlm.nih.gov/25027017/).
30. Kivipelto M, Ngandu T, Laatikainen T, Winblad B, Soininen H, Tuomilehto J. Risk score for the prediction of dementia risk in 20 years among middle aged people: a longitudinal, population-based study. *The Lancet Neurology*. 2006; 5(9):735–41. PMID: [16914401](https://pubmed.ncbi.nlm.nih.gov/16914401/)
31. Martin-Ponce E, Santolaria F, Aleman-Valls MR, Gonzalez-Reimers E, Martinez-Riera A, Rodriguez-Gaspar M, et al. Factors involved in the paradox of reverse epidemiology. *Clinical nutrition (Edinburgh, Scotland)*. 2010; 29(4):501–6. Epub 2010/02/02. doi: [10.1016/j.clnu.2009.12.009](https://doi.org/10.1016/j.clnu.2009.12.009) PMID: [20116147](https://pubmed.ncbi.nlm.nih.gov/20116147/).
32. Barnes DE, Covinsky KE, Whitmer RA, Kuller LH, Lopez OL, Yaffe K. Predicting risk of dementia in older adults The late-life dementia risk index. *Neurology*. 2009; 73(3):173–9. doi: [10.1212/WNL.0b013e3181a81636](https://doi.org/10.1212/WNL.0b013e3181a81636) WOS:000268147100004. PMID: [19439724](https://pubmed.ncbi.nlm.nih.gov/19439724/)
33. Board NC. Facilitating Timely Diagnosis and Support for People with Dementia. In: Board NC, editor. 2013.
34. Norton S, Matthews FE, Barnes DE, Yaffe K, Brayne C. Potential for primary prevention of Alzheimer's disease: an analysis of population-based data. *Lancet Neurol*. 2014; 13(8):788–94. Epub 2014/07/18. doi: [10.1016/s1474-4422\(14\)70136-x](https://doi.org/10.1016/s1474-4422(14)70136-x) PMID: [25030513](https://pubmed.ncbi.nlm.nih.gov/25030513/).
35. Stephan BC, Tzourio C, Auriacombe S, Amieva H, Dufouil C, Alperovitch A, et al. Usefulness of data from magnetic resonance imaging to improve prediction of dementia: population based cohort study. *Bmj*. 2015; 350:h2863. Epub 2015/06/24. doi: [10.1136/bmj.h2863](https://doi.org/10.1136/bmj.h2863) PMID: [26099688](https://pubmed.ncbi.nlm.nih.gov/26099688/).
36. Jorm AF, Masaki KH, Petrovitch H, Ross GW, White LR. Cognitive deficits 3 to 6 years before dementia onset in a population sample: the Honolulu-Asia aging study. *J Am Geriatr Soc*. 2005; 53(3):452–5. PMID: [15743288](https://pubmed.ncbi.nlm.nih.gov/15743288/)
37. Tierney MC, Yao C, Kiss A, McDowell I. Neuropsychological tests accurately predict incident Alzheimer disease after 5 and 10 years. *Neurology*. 2005; 64(11):1853–9. PMID: [15955933](https://pubmed.ncbi.nlm.nih.gov/15955933/)
38. Mitnitski A, Skoog I, Song X, Waern M, Ostling S, Sundh V, et al. A vascular risk factor index in relation to mortality and incident dementia. *Eur J Neurol*. 2006; 13(5):514–21. PMID: [16722978](https://pubmed.ncbi.nlm.nih.gov/16722978/)
39. Jack CRJ, Albert MS, Knopman DS, McKhann GM, Sperling RA, Carrillo MC, et al. Introduction to the recommendations from the National Institute on Aging-Alzheimer's Association workgroups on diagnostic guidelines for Alzheimer's disease. *Alzheimers Dement*. 2011; 7(3):257–62. doi: [10.1016/j.jalz.2011.03.004](https://doi.org/10.1016/j.jalz.2011.03.004) PMID: [21514247](https://pubmed.ncbi.nlm.nih.gov/21514247/)
40. Dubois B, Feldman HH, Jacova C, Hampel H, Molinuevo JL, Blennow K, et al. Advancing research diagnostic criteria for Alzheimer's disease: the IWG-2 criteria. *Lancet Neurol*. 2014; 13(6):614–29. doi: [10.1016/S1474-4422\(14\)70090-0](https://doi.org/10.1016/S1474-4422(14)70090-0) PMID: [24849862](https://pubmed.ncbi.nlm.nih.gov/24849862/)
